# Supplementary material for: Breaking Barriers to Effective Type 2 Diabetes Management: Findings from the use of the OPTIMA© Questionnaire in Clinical Practice
Source: Springer Nature journal article supplement (doi:10.1007/s12325-016-0341-6), 2016-05-18
Supplement: MOESM1 [file 10159436]

On le sait, suivre exactement les conseils de son médecin est difficile ; je vous propose de participer à un programme simple mais utile pour comprendre, équilibrer et/ou gérer votre diabète.

Etes-vous d'accord pour participer ?

**OPTION 1 : Le patient remplit le module imposé par randomisation**

Je vous propose d'approfondir le thème suivant :  
XXXXXX, en remplissant dans un premier temps un questionnaire sur ce thème.

**OPTION 2 : Le patient remplit le module de son choix**

Voici 5 thèmes différents mais qui ont tous un lien avec votre diabète de type 2. Je vous propose de choisir LE thème que vous souhaitez approfondir aujourd'hui, puis dans un premier temps de remplir le module du questionnaire correspondant.

Voici les 5 thèmes proposés :

Module 1 : Votre diabète et vos activités physiques

Module 2 : Votre diabète et vos médicaments

Module 3 : Votre diabète et votre alimentation

Module 4 : Connaissance du diabète

Module 5 : La mesure de la glycémie

Lequel de ces thèmes souhaitez-vous que nous approfondissions aujourd'hui ?

➡ **Choix du patient :** \_\_\_\_\_

Je vous propose donc de commencer par remplir le module du questionnaire correspondant à ce thème.

**Présentez le questionnaire au patient et assurez-vous que le patient ait compris.**

**Le patient complète le questionnaire que le médecin reprend ensuite avant d'entamer la discussion avec le patient pour essayer de déterminer un micro-objectif en s'appuyant sur les réponses du patient au questionnaire. Le remplissage et la discussion ont lieu le même jour que la consultation.**

S'il fallait choisir un objectif prioritaire ou un petit nombre d'objectifs pour mieux comprendre, équilibrer et/ou gérer votre diabète, quel serait votre choix ?

**Choix du patient :** \_\_\_\_\_

Pensez-vous qu'un tel effort ou un tel changement dans vos habitudes serait :

Pas du tout  
Utile  
☐<sub>1</sub>

Un petit peu  
Utile  
☐<sub>2</sub>

Moyennement  
Utile  
☐<sub>3</sub>

Très  
Utile  
☐<sub>4</sub>

Extrêmement  
Utile  
☐<sub>5</sub>

**Module 1 : Votre diabète et vos activités physiques,  
qu'en est-il pour vous ?**

Pour chacune des activités suivantes veuillez indiquer si pour vous cette activité est plus ou moins facile à faire, si pour vous elle est utile pour équilibrer votre diabète et à quelle fréquence vous la pratiquez. Pour cela, veuillez cocher la case correspondant le mieux à votre réponse.

**1.A. Bouger le plus possible à la maison c'est :**

|                                       |                                       |                                       |                                       |                                                  |
|---------------------------------------|---------------------------------------|---------------------------------------|---------------------------------------|--------------------------------------------------|
| Très difficile pour moi               | Difficile pour moi                    | Ni difficile ni facile pour moi       | Facile pour moi                       | Très facile pour moi                             |
| <input type="checkbox"/> <sub>1</sub> | <input type="checkbox"/> <sub>2</sub> | <input type="checkbox"/> <sub>3</sub> | <input type="checkbox"/> <sub>4</sub> | <input checked="" type="checkbox"/> <sub>5</sub> |

**1.B. Bouger le plus possible à la maison c'est :**

|                                                |                                       |                                                 |                                       |                                        |
|------------------------------------------------|---------------------------------------|-------------------------------------------------|---------------------------------------|----------------------------------------|
| Totalement inutile pour équilibrer mon diabète | Inutile pour équilibrer mon diabète   | Ni inutile ni utile pour équilibrer mon diabète | Utile pour équilibrer mon diabète     | Très utile pour équilibrer mon diabète |
| <input type="checkbox"/> <sub>1</sub>          | <input type="checkbox"/> <sub>2</sub> | <input type="checkbox"/> <sub>3</sub>           | <input type="checkbox"/> <sub>4</sub> | <input type="checkbox"/> <sub>5</sub>  |

**1.C. Bouger le plus possible à la maison :**

|                                       |                                       |                                       |                                       |                                       |
|---------------------------------------|---------------------------------------|---------------------------------------|---------------------------------------|---------------------------------------|
| Je ne le fais jamais                  | Je le fais rarement                   | Je le fais parfois                    | Je le fais souvent                    | Je le fais toujours                   |
| <input type="checkbox"/> <sub>1</sub> | <input type="checkbox"/> <sub>2</sub> | <input type="checkbox"/> <sub>3</sub> | <input type="checkbox"/> <sub>4</sub> | <input type="checkbox"/> <sub>5</sub> |

**2.A. Faire mes courses à pied c'est :**

|                                       |                                       |                                       |                                       |                                       |
|---------------------------------------|---------------------------------------|---------------------------------------|---------------------------------------|---------------------------------------|
| Très difficile pour moi               | Difficile pour moi                    | Ni difficile ni facile pour moi       | Facile pour moi                       | Très facile pour moi                  |
| <input type="checkbox"/> <sub>1</sub> | <input type="checkbox"/> <sub>2</sub> | <input type="checkbox"/> <sub>3</sub> | <input type="checkbox"/> <sub>4</sub> | <input type="checkbox"/> <sub>5</sub> |

**2.B. Faire mes courses à pied c'est :**

|                                                |                                       |                                                 |                                       |                                        |
|------------------------------------------------|---------------------------------------|-------------------------------------------------|---------------------------------------|----------------------------------------|
| Totalement inutile pour équilibrer mon diabète | Inutile pour équilibrer mon diabète   | Ni inutile ni utile pour équilibrer mon diabète | Utile pour équilibrer mon diabète     | Très utile pour équilibrer mon diabète |
| <input type="checkbox"/> <sub>1</sub>          | <input type="checkbox"/> <sub>2</sub> | <input type="checkbox"/> <sub>3</sub>           | <input type="checkbox"/> <sub>4</sub> | <input type="checkbox"/> <sub>5</sub>  |

**2.C. Faire mes courses à pied :**

|                                       |                                       |                                       |                                       |                                       |
|---------------------------------------|---------------------------------------|---------------------------------------|---------------------------------------|---------------------------------------|
| Je ne le fais jamais                  | Je le fais rarement                   | Je le fais parfois                    | Je le fais souvent                    | Je le fais toujours                   |
| <input type="checkbox"/> <sub>1</sub> | <input type="checkbox"/> <sub>2</sub> | <input type="checkbox"/> <sub>3</sub> | <input type="checkbox"/> <sub>4</sub> | <input type="checkbox"/> <sub>5</sub> |

**3.A. Prendre les escaliers le plus souvent possible c'est :**

|                                       |                                       |                                       |                                       |                                       |
|---------------------------------------|---------------------------------------|---------------------------------------|---------------------------------------|---------------------------------------|
| Très difficile pour moi               | Difficile pour moi                    | Ni difficile ni facile pour moi       | Facile pour moi                       | Très facile pour moi                  |
| <input type="checkbox"/> <sub>1</sub> | <input type="checkbox"/> <sub>2</sub> | <input type="checkbox"/> <sub>3</sub> | <input type="checkbox"/> <sub>4</sub> | <input type="checkbox"/> <sub>5</sub> |

**3.B. Prendre les escaliers le plus souvent possible c'est :**

|                                                |                                       |                                                 |                                       |                                        |
|------------------------------------------------|---------------------------------------|-------------------------------------------------|---------------------------------------|----------------------------------------|
| Totalement inutile pour équilibrer mon diabète | Inutile pour équilibrer mon diabète   | Ni inutile ni utile pour équilibrer mon diabète | Utile pour équilibrer mon diabète     | Très utile pour équilibrer mon diabète |
| <input type="checkbox"/> <sub>1</sub>          | <input type="checkbox"/> <sub>2</sub> | <input type="checkbox"/> <sub>3</sub>           | <input type="checkbox"/> <sub>4</sub> | <input type="checkbox"/> <sub>5</sub>  |

**3.C. Prendre les escaliers le plus souvent possible :**

|                                       |                                       |                                       |                                       |                                       |
|---------------------------------------|---------------------------------------|---------------------------------------|---------------------------------------|---------------------------------------|
| Je ne le fais jamais                  | Je le fais rarement                   | Je le fais parfois                    | Je le fais souvent                    | Je le fais toujours                   |
| <input type="checkbox"/> <sub>1</sub> | <input type="checkbox"/> <sub>2</sub> | <input type="checkbox"/> <sub>3</sub> | <input type="checkbox"/> <sub>4</sub> | <input type="checkbox"/> <sub>5</sub> |

**Module 1 : Votre diabète et vos activités physiques,  
qu'en est-il pour vous ?**

**4.A. Jardiner c'est :**

|                                       |                                       |                                       |                                       |                                       |
|---------------------------------------|---------------------------------------|---------------------------------------|---------------------------------------|---------------------------------------|
| Très difficile pour moi               | Difficile pour moi                    | Ni difficile ni facile pour moi       | Facile pour moi                       | Très facile pour moi                  |
| <input type="checkbox"/> <sub>1</sub> | <input type="checkbox"/> <sub>2</sub> | <input type="checkbox"/> <sub>3</sub> | <input type="checkbox"/> <sub>4</sub> | <input type="checkbox"/> <sub>5</sub> |

**4.B. Jardiner c'est :**

|                                                |                                       |                                                 |                                       |                                        |
|------------------------------------------------|---------------------------------------|-------------------------------------------------|---------------------------------------|----------------------------------------|
| Totalement inutile pour équilibrer mon diabète | Inutile pour équilibrer mon diabète   | Ni inutile ni utile pour équilibrer mon diabète | Utile pour équilibrer mon diabète     | Très utile pour équilibrer mon diabète |
| <input type="checkbox"/> <sub>1</sub>          | <input type="checkbox"/> <sub>2</sub> | <input type="checkbox"/> <sub>3</sub>           | <input type="checkbox"/> <sub>4</sub> | <input type="checkbox"/> <sub>5</sub>  |

**4.C. Jardiner :**

|                                       |                                       |                                       |                                       |                                       |
|---------------------------------------|---------------------------------------|---------------------------------------|---------------------------------------|---------------------------------------|
| Je ne le fais jamais                  | Je le fais rarement                   | Je le fais parfois                    | Je le fais souvent                    | Je le fais toujours                   |
| <input type="checkbox"/> <sub>1</sub> | <input type="checkbox"/> <sub>2</sub> | <input type="checkbox"/> <sub>3</sub> | <input type="checkbox"/> <sub>4</sub> | <input type="checkbox"/> <sub>5</sub> |

**5.A. Marcher à pied au lieu de prendre la voiture ou les transports en commun c'est :**

|                                       |                                       |                                       |                                       |                                       |
|---------------------------------------|---------------------------------------|---------------------------------------|---------------------------------------|---------------------------------------|
| Très difficile pour moi               | Difficile pour moi                    | Ni difficile ni facile pour moi       | Facile pour moi                       | Très facile pour moi                  |
| <input type="checkbox"/> <sub>1</sub> | <input type="checkbox"/> <sub>2</sub> | <input type="checkbox"/> <sub>3</sub> | <input type="checkbox"/> <sub>4</sub> | <input type="checkbox"/> <sub>5</sub> |

**5.B. Marcher à pied au lieu de prendre la voiture ou les transports en commun c'est :**

|                                                |                                       |                                                 |                                       |                                        |
|------------------------------------------------|---------------------------------------|-------------------------------------------------|---------------------------------------|----------------------------------------|
| Totalement inutile pour équilibrer mon diabète | Inutile pour équilibrer mon diabète   | Ni inutile ni utile pour équilibrer mon diabète | Utile pour équilibrer mon diabète     | Très utile pour équilibrer mon diabète |
| <input type="checkbox"/> <sub>1</sub>          | <input type="checkbox"/> <sub>2</sub> | <input type="checkbox"/> <sub>3</sub>           | <input type="checkbox"/> <sub>4</sub> | <input type="checkbox"/> <sub>5</sub>  |

**5.C. Marcher à pied au lieu de prendre la voiture ou les transports en commun :**

|                                       |                                       |                                       |                                       |                                       |
|---------------------------------------|---------------------------------------|---------------------------------------|---------------------------------------|---------------------------------------|
| Je ne le fais jamais                  | Je le fais rarement                   | Je le fais parfois                    | Je le fais souvent                    | Je le fais toujours                   |
| <input type="checkbox"/> <sub>1</sub> | <input type="checkbox"/> <sub>2</sub> | <input type="checkbox"/> <sub>3</sub> | <input type="checkbox"/> <sub>4</sub> | <input type="checkbox"/> <sub>5</sub> |

**6.A. Faire une activité sportive c'est :**

|                                       |                                       |                                       |                                       |                                       |
|---------------------------------------|---------------------------------------|---------------------------------------|---------------------------------------|---------------------------------------|
| Très difficile pour moi               | Difficile pour moi                    | Ni difficile ni facile pour moi       | Facile pour moi                       | Très facile pour moi                  |
| <input type="checkbox"/> <sub>1</sub> | <input type="checkbox"/> <sub>2</sub> | <input type="checkbox"/> <sub>3</sub> | <input type="checkbox"/> <sub>4</sub> | <input type="checkbox"/> <sub>5</sub> |

**6.B. Faire une activité sportive c'est :**

|                                                |                                       |                                                 |                                       |                                        |
|------------------------------------------------|---------------------------------------|-------------------------------------------------|---------------------------------------|----------------------------------------|
| Totalement inutile pour équilibrer mon diabète | Inutile pour équilibrer mon diabète   | Ni inutile ni utile pour équilibrer mon diabète | Utile pour équilibrer mon diabète     | Très utile pour équilibrer mon diabète |
| <input type="checkbox"/> <sub>1</sub>          | <input type="checkbox"/> <sub>2</sub> | <input type="checkbox"/> <sub>3</sub>           | <input type="checkbox"/> <sub>4</sub> | <input type="checkbox"/> <sub>5</sub>  |

**6.C. Faire une activité sportive :**

|                                       |                                       |                                       |                                       |                                       |
|---------------------------------------|---------------------------------------|---------------------------------------|---------------------------------------|---------------------------------------|
| Je ne le fais jamais                  | Je le fais rarement                   | Je le fais parfois                    | Je le fais souvent                    | Je le fais toujours                   |
| <input type="checkbox"/> <sub>1</sub> | <input type="checkbox"/> <sub>2</sub> | <input type="checkbox"/> <sub>3</sub> | <input type="checkbox"/> <sub>4</sub> | <input type="checkbox"/> <sub>5</sub> |

**7.A. Faire des promenades à pied ou en vélo c'est :**

|                                       |                                       |                                       |                                       |                                       |
|---------------------------------------|---------------------------------------|---------------------------------------|---------------------------------------|---------------------------------------|
| Très difficile pour moi               | Difficile pour moi                    | Ni difficile ni facile pour moi       | Facile pour moi                       | Très facile pour moi                  |
| <input type="checkbox"/> <sub>1</sub> | <input type="checkbox"/> <sub>2</sub> | <input type="checkbox"/> <sub>3</sub> | <input type="checkbox"/> <sub>4</sub> | <input type="checkbox"/> <sub>5</sub> |

**7.B. Faire des promenades à pied ou en vélo c'est :**

|                                                |                                       |                                                 |                                       |                                        |
|------------------------------------------------|---------------------------------------|-------------------------------------------------|---------------------------------------|----------------------------------------|
| Totalement inutile pour équilibrer mon diabète | Inutile pour équilibrer mon diabète   | Ni inutile ni utile pour équilibrer mon diabète | Utile pour équilibrer mon diabète     | Très utile pour équilibrer mon diabète |
| <input type="checkbox"/> <sub>1</sub>          | <input type="checkbox"/> <sub>2</sub> | <input type="checkbox"/> <sub>3</sub>           | <input type="checkbox"/> <sub>4</sub> | <input type="checkbox"/> <sub>5</sub>  |

**Module 1 : Votre diabète et vos activités physiques,  
qu'en est-il pour vous ?**

**7.C. Faire des promenades à pied ou en vélo :**

Je ne le fais jamais ☐<sub>1</sub> Je le fais rarement ☐<sub>2</sub> Je le fais parfois ☐<sub>3</sub> Je le fais souvent ☐<sub>4</sub> Je le fais toujours ☐<sub>5</sub>

**8.A. Avoir des activités physiques en été c'est :**

Très difficile pour moi ☐<sub>1</sub> Difficile pour moi ☐<sub>2</sub> Ni difficile ni facile pour moi ☐<sub>3</sub> Facile pour moi ☐<sub>4</sub> Très facile pour moi ☐<sub>5</sub>

**8.B. Avoir des activités physiques en été c'est :**

Totalement inutile pour équilibrer mon diabète ☐<sub>1</sub> Inutile pour équilibrer mon diabète ☐<sub>2</sub> Ni inutile ni utile pour équilibrer mon diabète ☐<sub>3</sub> Utile pour équilibrer mon diabète ☐<sub>4</sub> Très utile pour équilibrer mon diabète ☐<sub>5</sub>

**8.C. Avoir des activités physiques en été :**

Je ne le fais jamais ☐<sub>1</sub> Je le fais rarement ☐<sub>2</sub> Je le fais parfois ☐<sub>3</sub> Je le fais souvent ☐<sub>4</sub> Je le fais toujours ☐<sub>5</sub>

**9.A. Avoir des activités physiques en hiver c'est :**

Très difficile pour moi ☐<sub>1</sub> Difficile pour moi ☐<sub>2</sub> Ni difficile ni facile pour moi ☐<sub>3</sub> Facile pour moi ☐<sub>4</sub> Très facile pour moi ☐<sub>5</sub>

**9.B. Avoir des activités physiques en hiver c'est :**

Totalement inutile pour équilibrer mon diabète ☐<sub>1</sub> Inutile pour équilibrer mon diabète ☐<sub>2</sub> Ni inutile ni utile pour équilibrer mon diabète ☐<sub>3</sub> Utile pour équilibrer mon diabète ☐<sub>4</sub> Très utile pour équilibrer mon diabète ☐<sub>5</sub>

**9.C. Avoir des activités physiques en hiver :**

Je ne le fais jamais ☐<sub>1</sub> Je le fais rarement ☐<sub>2</sub> Je le fais parfois ☐<sub>3</sub> Je le fais souvent ☐<sub>4</sub> Je le fais toujours ☐<sub>5</sub>

**10.A. Faire du vélo d'appartement c'est :**

Très difficile pour moi ☐<sub>1</sub> Difficile pour moi ☐<sub>2</sub> Ni difficile ni facile pour moi ☐<sub>3</sub> Facile pour moi ☐<sub>4</sub> Très facile pour moi ☐<sub>5</sub>

**10.B. Faire du vélo d'appartement c'est :**

Totalement inutile pour équilibrer mon diabète ☐<sub>1</sub> Inutile pour équilibrer mon diabète ☐<sub>2</sub> Ni inutile ni utile pour équilibrer mon diabète ☐<sub>3</sub> Utile pour équilibrer mon diabète ☐<sub>4</sub> Très utile pour équilibrer mon diabète ☐<sub>5</sub>

**10.C. Faire du vélo d'appartement :**

Je ne le fais jamais ☐<sub>1</sub> Je le fais rarement ☐<sub>2</sub> Je le fais parfois ☐<sub>3</sub> Je le fais souvent ☐<sub>4</sub> Je le fais toujours ☐<sub>5</sub>

**11.A. Faire de la gymnastique douce c'est :**

Très difficile pour moi ☐<sub>1</sub> Difficile pour moi ☐<sub>2</sub> Ni difficile ni facile pour moi ☐<sub>3</sub> Facile pour moi ☐<sub>4</sub> Très facile pour moi ☐<sub>5</sub>

**Module 1 : Votre diabète et vos activités physiques,  
qu'en est-il pour vous ?**

**11.B. Faire de la gymnastique douce c'est :**

Totalement inutile  
pour équilibrer mon  
diabète

☐<sub>1</sub>

Inutile pour  
équilibrer mon  
diabète

☐<sub>2</sub>

Ni inutile ni utile  
pour équilibrer mon  
diabète

☐<sub>3</sub>

Utile pour équilibrer  
mon diabète

☐<sub>4</sub>

Très utile pour  
équilibrer mon  
diabète

☐<sub>5</sub>

**11.C. Faire de la gymnastique douce:**

Je ne le fais jamais

☐<sub>1</sub>

Je le fais rarement

☐<sub>2</sub>

Je le fais parfois

☐<sub>3</sub>

Je le fais souvent

☐<sub>4</sub>

Je le fais toujours

☐<sub>5</sub>

**12. Quelle activité physique serait réellement réalisable en plus de ce que vous faites déjà actuellement ?**

**13. Pendant combien de temps pourriez-vous faire cette activité physique ?**

- ☐<sub>1</sub> Moins de 15 minutes
- ☐<sub>2</sub> Moins de 30 minutes
- ☐<sub>3</sub> Moins d'une heure
- ☐<sub>4</sub> Plus d'une heure

**14. Combien de fois par semaine pourriez-vous faire cette activité physique ?**

- ☐<sub>1</sub> 1 fois par semaine
- ☐<sub>2</sub> 2 fois par semaine
- ☐<sub>3</sub> 3 fois par semaine
- ☐<sub>4</sub> 4 fois par semaine
- ☐<sub>5</sub> 5 fois par semaine
- ☐<sub>6</sub> 6 fois par semaine
- ☐<sub>7</sub> Tous les jours

*Un traitement de vos données personnelles va être mis en œuvre pour permettre d'analyser les résultats de l'étude observationnelle à laquelle vous participez. A cette fin, les données médicales vous concernant et les données relatives à vos habitudes de vie seront transmises au Promoteur de la recherche ou aux personnes ou sociétés agissant pour son compte, en France. Ces données pourront également, dans des conditions assurant leur confidentialité, être transmises aux autorités de santé françaises ou étrangères, à d'autres entités du Promoteur. Conformément aux dispositions de loi relative à l'informatique aux fichiers et aux libertés, vous disposez d'un droit d'accès et de rectification. Vous disposez également d'un droit d'opposition à la transmission des données couvertes par le secret professionnel susceptibles d'être utilisées dans le cadre de cette recherche et d'être traitées. Vous pouvez également accéder directement ou par l'intermédiaire d'un médecin de votre choix à l'ensemble de vos données médicales en application des dispositions de l'article L 1111-7 du Code de la Santé Publique. Ces droits s'exercent auprès du médecin qui vous suit dans le cadre de la recherche et qui connaît votre identité.*

**Module 2 : Votre diabète et vos médicaments,**  
**qu'en est-il pour vous ?**

Pour chacune des affirmations suivantes veuillez indiquer si pour vous c'est quelque chose de plus ou moins facile à faire, si pour vous c'est utile pour équilibrer votre diabète et à quelle fréquence vous le faites. Pour cela, veuillez cocher la case correspondant le mieux à votre réponse.

**1.A. Prendre mes médicaments tous les jours c'est :**

|                                       |                                       |                                       |                                       |                                       |
|---------------------------------------|---------------------------------------|---------------------------------------|---------------------------------------|---------------------------------------|
| Très difficile pour moi               | Difficile pour moi                    | Ni difficile ni facile pour moi       | Facile pour moi                       | Très facile pour moi                  |
| <input type="checkbox"/> <sub>1</sub> | <input type="checkbox"/> <sub>2</sub> | <input type="checkbox"/> <sub>3</sub> | <input type="checkbox"/> <sub>4</sub> | <input type="checkbox"/> <sub>5</sub> |

**1.B. Prendre mes médicaments tous les jours c'est :**

|                                                |                                       |                                                 |                                       |                                        |
|------------------------------------------------|---------------------------------------|-------------------------------------------------|---------------------------------------|----------------------------------------|
| Totalement inutile pour équilibrer mon diabète | Inutile pour équilibrer mon diabète   | Ni inutile ni utile pour équilibrer mon diabète | Utile pour équilibrer mon diabète     | Très utile pour équilibrer mon diabète |
| <input type="checkbox"/> <sub>1</sub>          | <input type="checkbox"/> <sub>2</sub> | <input type="checkbox"/> <sub>3</sub>           | <input type="checkbox"/> <sub>4</sub> | <input type="checkbox"/> <sub>5</sub>  |

**1.C. Prendre mes médicaments tous les jours :**

|                                       |                                       |                                       |                                       |                                       |
|---------------------------------------|---------------------------------------|---------------------------------------|---------------------------------------|---------------------------------------|
| Je ne le fais jamais                  | Je le fais rarement                   | Je le fais parfois                    | Je le fais souvent                    | Je le fais toujours                   |
| <input type="checkbox"/> <sub>1</sub> | <input type="checkbox"/> <sub>2</sub> | <input type="checkbox"/> <sub>3</sub> | <input type="checkbox"/> <sub>4</sub> | <input type="checkbox"/> <sub>5</sub> |

**2.A. Prendre mes médicaments en dehors de chez moi c'est :**

|                                       |                                       |                                       |                                       |                                       |
|---------------------------------------|---------------------------------------|---------------------------------------|---------------------------------------|---------------------------------------|
| Très difficile pour moi               | Difficile pour moi                    | Ni difficile ni facile pour moi       | Facile pour moi                       | Très facile pour moi                  |
| <input type="checkbox"/> <sub>1</sub> | <input type="checkbox"/> <sub>2</sub> | <input type="checkbox"/> <sub>3</sub> | <input type="checkbox"/> <sub>4</sub> | <input type="checkbox"/> <sub>5</sub> |

**2.B. Prendre mes médicaments en dehors de chez moi c'est :**

|                                                |                                       |                                                 |                                       |                                        |
|------------------------------------------------|---------------------------------------|-------------------------------------------------|---------------------------------------|----------------------------------------|
| Totalement inutile pour équilibrer mon diabète | Inutile pour équilibrer mon diabète   | Ni inutile ni utile pour équilibrer mon diabète | Utile pour équilibrer mon diabète     | Très utile pour équilibrer mon diabète |
| <input type="checkbox"/> <sub>1</sub>          | <input type="checkbox"/> <sub>2</sub> | <input type="checkbox"/> <sub>3</sub>           | <input type="checkbox"/> <sub>4</sub> | <input type="checkbox"/> <sub>5</sub>  |

**2.C. Prendre mes médicaments en dehors de chez moi :**

|                                       |                                       |                                       |                                       |                                       |
|---------------------------------------|---------------------------------------|---------------------------------------|---------------------------------------|---------------------------------------|
| Je ne le fais jamais                  | Je le fais rarement                   | Je le fais parfois                    | Je le fais souvent                    | Je le fais toujours                   |
| <input type="checkbox"/> <sub>1</sub> | <input type="checkbox"/> <sub>2</sub> | <input type="checkbox"/> <sub>3</sub> | <input type="checkbox"/> <sub>4</sub> | <input type="checkbox"/> <sub>5</sub> |

**3.A. Prendre mes médicaments en vacances c'est :**

|                                       |                                       |                                       |                                       |                                       |
|---------------------------------------|---------------------------------------|---------------------------------------|---------------------------------------|---------------------------------------|
| Très difficile pour moi               | Difficile pour moi                    | Ni difficile ni facile pour moi       | Facile pour moi                       | Très facile pour moi                  |
| <input type="checkbox"/> <sub>1</sub> | <input type="checkbox"/> <sub>2</sub> | <input type="checkbox"/> <sub>3</sub> | <input type="checkbox"/> <sub>4</sub> | <input type="checkbox"/> <sub>5</sub> |

**3.B. Prendre mes médicaments en vacances c'est :**

|                                                |                                       |                                                 |                                       |                                        |
|------------------------------------------------|---------------------------------------|-------------------------------------------------|---------------------------------------|----------------------------------------|
| Totalement inutile pour équilibrer mon diabète | Inutile pour équilibrer mon diabète   | Ni inutile ni utile pour équilibrer mon diabète | Utile pour équilibrer mon diabète     | Très utile pour équilibrer mon diabète |
| <input type="checkbox"/> <sub>1</sub>          | <input type="checkbox"/> <sub>2</sub> | <input type="checkbox"/> <sub>3</sub>           | <input type="checkbox"/> <sub>4</sub> | <input type="checkbox"/> <sub>5</sub>  |

**3.C. Prendre mes médicaments en vacances :**

|                                       |                                       |                                       |                                       |                                       |
|---------------------------------------|---------------------------------------|---------------------------------------|---------------------------------------|---------------------------------------|
| Je ne le fais jamais                  | Je le fais rarement                   | Je le fais parfois                    | Je le fais souvent                    | Je le fais toujours                   |
| <input type="checkbox"/> <sub>1</sub> | <input type="checkbox"/> <sub>2</sub> | <input type="checkbox"/> <sub>3</sub> | <input type="checkbox"/> <sub>4</sub> | <input type="checkbox"/> <sub>5</sub> |

## Module 2 : Votre diabète et vos médicaments.

### qu'en est-il pour vous ?

#### 4.A. Ne pas tomber en panne de médicaments c'est :

|                            |                            |                                 |                            |                            |
|----------------------------|----------------------------|---------------------------------|----------------------------|----------------------------|
| Très difficile pour moi    | Difficile pour moi         | Ni difficile ni facile pour moi | Facile pour moi            | Très facile pour moi       |
| <input type="checkbox"/> 1 | <input type="checkbox"/> 2 | <input type="checkbox"/> 3      | <input type="checkbox"/> 4 | <input type="checkbox"/> 5 |

#### 4.B. Ne pas tomber en panne de médicaments c'est :

|                                                |                                     |                                                 |                                   |                                        |
|------------------------------------------------|-------------------------------------|-------------------------------------------------|-----------------------------------|----------------------------------------|
| Totalement inutile pour équilibrer mon diabète | Inutile pour équilibrer mon diabète | Ni inutile ni utile pour équilibrer mon diabète | Utile pour équilibrer mon diabète | Très utile pour équilibrer mon diabète |
| <input type="checkbox"/> 1                     | <input type="checkbox"/> 2          | <input type="checkbox"/> 3                      | <input type="checkbox"/> 4        | <input type="checkbox"/> 5             |

#### 4.C. Ne pas tomber en panne de médicaments :

|                            |                            |                            |                            |                            |
|----------------------------|----------------------------|----------------------------|----------------------------|----------------------------|
| Je ne le fais jamais       | Je le fais rarement        | Je le fais parfois         | Je le fais souvent         | Je le fais toujours        |
| <input type="checkbox"/> 1 | <input type="checkbox"/> 2 | <input type="checkbox"/> 3 | <input type="checkbox"/> 4 | <input type="checkbox"/> 5 |

#### 5.A. Penser à prendre mes médicaments c'est :

|                            |                            |                                 |                            |                            |
|----------------------------|----------------------------|---------------------------------|----------------------------|----------------------------|
| Très difficile pour moi    | Difficile pour moi         | Ni difficile ni facile pour moi | Facile pour moi            | Très facile pour moi       |
| <input type="checkbox"/> 1 | <input type="checkbox"/> 2 | <input type="checkbox"/> 3      | <input type="checkbox"/> 4 | <input type="checkbox"/> 5 |

#### 5.B. Penser à prendre mes médicaments c'est :

|                                                |                                     |                                                 |                                   |                                        |
|------------------------------------------------|-------------------------------------|-------------------------------------------------|-----------------------------------|----------------------------------------|
| Totalement inutile pour équilibrer mon diabète | Inutile pour équilibrer mon diabète | Ni inutile ni utile pour équilibrer mon diabète | Utile pour équilibrer mon diabète | Très utile pour équilibrer mon diabète |
| <input type="checkbox"/> 1                     | <input type="checkbox"/> 2          | <input type="checkbox"/> 3                      | <input type="checkbox"/> 4        | <input type="checkbox"/> 5             |

#### 5.C. Penser à prendre mes médicaments :

|                            |                            |                            |                            |                            |
|----------------------------|----------------------------|----------------------------|----------------------------|----------------------------|
| Je ne le fais jamais       | Je le fais rarement        | Je le fais parfois         | Je le fais souvent         | Je le fais toujours        |
| <input type="checkbox"/> 1 | <input type="checkbox"/> 2 | <input type="checkbox"/> 3 | <input type="checkbox"/> 4 | <input type="checkbox"/> 5 |

#### 6.A. Supporter les effets secondaires de mes médicaments c'est :

|                            |                            |                                 |                            |                            |
|----------------------------|----------------------------|---------------------------------|----------------------------|----------------------------|
| Très difficile pour moi    | Difficile pour moi         | Ni difficile ni facile pour moi | Facile pour moi            | Très facile pour moi       |
| <input type="checkbox"/> 1 | <input type="checkbox"/> 2 | <input type="checkbox"/> 3      | <input type="checkbox"/> 4 | <input type="checkbox"/> 5 |

#### 6.B. Supporter les effets secondaires de mes médicaments c'est :

|                                                |                                     |                                                 |                                   |                                        |
|------------------------------------------------|-------------------------------------|-------------------------------------------------|-----------------------------------|----------------------------------------|
| Totalement inutile pour équilibrer mon diabète | Inutile pour équilibrer mon diabète | Ni inutile ni utile pour équilibrer mon diabète | Utile pour équilibrer mon diabète | Très utile pour équilibrer mon diabète |
| <input type="checkbox"/> 1                     | <input type="checkbox"/> 2          | <input type="checkbox"/> 3                      | <input type="checkbox"/> 4        | <input type="checkbox"/> 5             |

#### 6.C. Supporter les effets secondaires de mes médicaments :

|                            |                            |                            |                            |                            |
|----------------------------|----------------------------|----------------------------|----------------------------|----------------------------|
| Je ne le fais jamais       | Je le fais rarement        | Je le fais parfois         | Je le fais souvent         | Je le fais toujours        |
| <input type="checkbox"/> 1 | <input type="checkbox"/> 2 | <input type="checkbox"/> 3 | <input type="checkbox"/> 4 | <input type="checkbox"/> 5 |

#### 7.A. Trouver les réponses aux questions que je me pose sur mes médicaments c'est :

|                            |                            |                                 |                            |                            |
|----------------------------|----------------------------|---------------------------------|----------------------------|----------------------------|
| Très difficile pour moi    | Difficile pour moi         | Ni difficile ni facile pour moi | Facile pour moi            | Très facile pour moi       |
| <input type="checkbox"/> 1 | <input type="checkbox"/> 2 | <input type="checkbox"/> 3      | <input type="checkbox"/> 4 | <input type="checkbox"/> 5 |

#### 7.B. Trouver les réponses aux questions que je me pose sur mes médicaments c'est :

|                                                |                                     |                                                 |                                   |                                        |
|------------------------------------------------|-------------------------------------|-------------------------------------------------|-----------------------------------|----------------------------------------|
| Totalement inutile pour équilibrer mon diabète | Inutile pour équilibrer mon diabète | Ni inutile ni utile pour équilibrer mon diabète | Utile pour équilibrer mon diabète | Très utile pour équilibrer mon diabète |
| <input type="checkbox"/> 1                     | <input type="checkbox"/> 2          | <input type="checkbox"/> 3                      | <input type="checkbox"/> 4        | <input type="checkbox"/> 5             |

## Module 2 : Votre diabète et vos médicaments.

### qu'en est-il pour vous ?

#### 7.C. Trouver les réponses aux questions que je me pose sur mes médicaments :

Je ne le fais jamais ☐<sub>1</sub> Je le fais rarement ☐<sub>2</sub> Je le fais parfois ☐<sub>3</sub> Je le fais souvent ☐<sub>4</sub> Je le fais toujours ☐<sub>5</sub>

#### 8.A. Savoir à quoi sert chaque médicament pour mon diabète c'est :

Très difficile pour moi ☐<sub>1</sub> Difficile pour moi ☐<sub>2</sub> Ni difficile ni facile pour moi ☐<sub>3</sub> Facile pour moi ☐<sub>4</sub> Très facile pour moi ☐<sub>5</sub>

#### 8.B. Savoir à quoi sert chaque médicament pour mon diabète c'est :

Totalement inutile pour équilibrer mon diabète ☐<sub>1</sub> Inutile pour équilibrer mon diabète ☐<sub>2</sub> Ni inutile ni utile pour équilibrer mon diabète ☐<sub>3</sub> Utile pour équilibrer mon diabète ☐<sub>4</sub> Très utile pour équilibrer mon diabète ☐<sub>5</sub>

#### 9.A. Comprendre comment marchent mes médicaments pour mon diabète c'est :

Très difficile pour moi ☐<sub>1</sub> Difficile pour moi ☐<sub>2</sub> Ni difficile ni facile pour moi ☐<sub>3</sub> Facile pour moi ☐<sub>4</sub> Très facile pour moi ☐<sub>5</sub>

#### 9.B. Comprendre comment marchent mes médicaments pour mon diabète c'est :

Totalement inutile pour équilibrer mon diabète ☐<sub>1</sub> Inutile pour équilibrer mon diabète ☐<sub>2</sub> Ni inutile ni utile pour équilibrer mon diabète ☐<sub>3</sub> Utile pour équilibrer mon diabète ☐<sub>4</sub> Très utile pour équilibrer mon diabète ☐<sub>5</sub>

#### 10. Certains médicaments sont-ils plus difficiles à prendre que d'autres ?

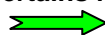 Lesquels et pourquoi :

#### 11. A quelle heure de la journée est-il plus difficile de prendre ses médicaments ?

☐<sub>1</sub> Matin  
☐<sub>2</sub> Midi  
☐<sub>3</sub> Soir  
☐<sub>4</sub> Au coucher

#### 12. Que pensez-vous pouvoir faire pour améliorer la prise quotidienne de vos médicaments sans oublier ?

**Module 2 : Votre diabète et vos médicaments,**  
**qu'en est-il pour vous ?**

*Un traitement de vos données personnelles va être mis en œuvre pour permettre d'analyser les résultats de l'étude observationnelle à laquelle vous participez. A cette fin, les données médicales vous concernant et les données relatives à vos habitudes de vie seront transmises au Promoteur de la recherche ou aux personnes ou sociétés agissant pour son compte, en France. Ces données pourront également, dans des conditions assurant leur confidentialité, être transmises aux autorités de santé françaises ou étrangères, à d'autres entités du Promoteur. Conformément aux dispositions de loi relative à l'informatique aux fichiers et aux libertés, vous disposez d'un droit d'accès et de rectification. Vous disposez également d'un droit d'opposition à la transmission des données couvertes par le secret professionnel susceptibles d'être utilisées dans le cadre de cette recherche et d'être traitées. Vous pouvez également accéder directement ou par l'intermédiaire d'un médecin de votre choix à l'ensemble de vos données médicales en application des dispositions de l'article L 1111-7 du Code de la Santé Publique. Ces droits s'exercent auprès du médecin qui vous suit dans le cadre de la recherche et qui connaît votre identité.*

Read Only Copy

**Module 3 : Votre diabète et votre alimentation,**  
**qu'en est-il pour vous ?**

Pour chacune des affirmations suivantes veuillez indiquer si c'est plus ou moins facile à faire et si c'est utile pour équilibrer votre diabète. Pour cela, veuillez cocher la case correspondant le mieux à votre réponse.

**1.A. Savoir quels aliments ou boissons sont bons ou mauvais pour mon diabète c'est :**

|                                       |                                       |                                       |                                       |                                       |
|---------------------------------------|---------------------------------------|---------------------------------------|---------------------------------------|---------------------------------------|
| Très difficile pour moi               | Difficile pour moi                    | Ni difficile ni facile pour moi       | Facile pour moi                       | Très facile pour moi                  |
| <input type="checkbox"/> <sub>1</sub> | <input type="checkbox"/> <sub>2</sub> | <input type="checkbox"/> <sub>3</sub> | <input type="checkbox"/> <sub>4</sub> | <input type="checkbox"/> <sub>5</sub> |

**1.B. Savoir quels aliments ou boissons sont bons ou mauvais pour mon diabète c'est :**

|                                                |                                       |                                                 |                                       |                                        |
|------------------------------------------------|---------------------------------------|-------------------------------------------------|---------------------------------------|----------------------------------------|
| Totalement inutile pour équilibrer mon diabète | Inutile pour équilibrer mon diabète   | Ni inutile ni utile pour équilibrer mon diabète | Utile pour équilibrer mon diabète     | Très utile pour équilibrer mon diabète |
| <input type="checkbox"/> <sub>1</sub>          | <input type="checkbox"/> <sub>2</sub> | <input type="checkbox"/> <sub>3</sub>           | <input type="checkbox"/> <sub>4</sub> | <input type="checkbox"/> <sub>5</sub>  |

**2.A. Savoir quoi acheter à manger quand je fais les courses c'est :**

|                                       |                                       |                                       |                                       |                                       |
|---------------------------------------|---------------------------------------|---------------------------------------|---------------------------------------|---------------------------------------|
| Très difficile pour moi               | Difficile pour moi                    | Ni difficile ni facile pour moi       | Facile pour moi                       | Très facile pour moi                  |
| <input type="checkbox"/> <sub>1</sub> | <input type="checkbox"/> <sub>2</sub> | <input type="checkbox"/> <sub>3</sub> | <input type="checkbox"/> <sub>4</sub> | <input type="checkbox"/> <sub>5</sub> |

**2.B. Savoir quoi acheter à manger quand je fais les courses c'est :**

|                                                |                                       |                                                 |                                       |                                        |
|------------------------------------------------|---------------------------------------|-------------------------------------------------|---------------------------------------|----------------------------------------|
| Totalement inutile pour équilibrer mon diabète | Inutile pour équilibrer mon diabète   | Ni inutile ni utile pour équilibrer mon diabète | Utile pour équilibrer mon diabète     | Très utile pour équilibrer mon diabète |
| <input type="checkbox"/> <sub>1</sub>          | <input type="checkbox"/> <sub>2</sub> | <input type="checkbox"/> <sub>3</sub>           | <input type="checkbox"/> <sub>4</sub> | <input type="checkbox"/> <sub>5</sub>  |

**3.A. Savoir ce que je peux faire comme écarts c'est :**

|                                       |                                       |                                       |                                       |                                       |
|---------------------------------------|---------------------------------------|---------------------------------------|---------------------------------------|---------------------------------------|
| Très difficile pour moi               | Difficile pour moi                    | Ni difficile ni facile pour moi       | Facile pour moi                       | Très facile pour moi                  |
| <input type="checkbox"/> <sub>1</sub> | <input type="checkbox"/> <sub>2</sub> | <input type="checkbox"/> <sub>3</sub> | <input type="checkbox"/> <sub>4</sub> | <input type="checkbox"/> <sub>5</sub> |

**3.B. Savoir ce que je peux faire comme écarts c'est :**

|                                                |                                       |                                                 |                                       |                                        |
|------------------------------------------------|---------------------------------------|-------------------------------------------------|---------------------------------------|----------------------------------------|
| Totalement inutile pour équilibrer mon diabète | Inutile pour équilibrer mon diabète   | Ni inutile ni utile pour équilibrer mon diabète | Utile pour équilibrer mon diabète     | Très utile pour équilibrer mon diabète |
| <input type="checkbox"/> <sub>1</sub>          | <input type="checkbox"/> <sub>2</sub> | <input type="checkbox"/> <sub>3</sub>           | <input type="checkbox"/> <sub>4</sub> | <input type="checkbox"/> <sub>5</sub>  |

**4.A. Gérer mon alimentation c'est :**

|                                       |                                       |                                       |                                       |                                       |
|---------------------------------------|---------------------------------------|---------------------------------------|---------------------------------------|---------------------------------------|
| Très difficile pour moi               | Difficile pour moi                    | Ni difficile ni facile pour moi       | Facile pour moi                       | Très facile pour moi                  |
| <input type="checkbox"/> <sub>1</sub> | <input type="checkbox"/> <sub>2</sub> | <input type="checkbox"/> <sub>3</sub> | <input type="checkbox"/> <sub>4</sub> | <input type="checkbox"/> <sub>5</sub> |

**4.B. Gérer mon alimentation c'est :**

|                                                |                                       |                                                 |                                       |                                        |
|------------------------------------------------|---------------------------------------|-------------------------------------------------|---------------------------------------|----------------------------------------|
| Totalement inutile pour équilibrer mon diabète | Inutile pour équilibrer mon diabète   | Ni inutile ni utile pour équilibrer mon diabète | Utile pour équilibrer mon diabète     | Très utile pour équilibrer mon diabète |
| <input type="checkbox"/> <sub>1</sub>          | <input type="checkbox"/> <sub>2</sub> | <input type="checkbox"/> <sub>3</sub>           | <input type="checkbox"/> <sub>4</sub> | <input type="checkbox"/> <sub>5</sub>  |

**4.C. Gérer mon alimentation :**

|                                       |                                       |                                       |                                       |                                       |
|---------------------------------------|---------------------------------------|---------------------------------------|---------------------------------------|---------------------------------------|
| Je ne le fais jamais                  | Je le fais rarement                   | Je le fais parfois                    | Je le fais souvent                    | Je le fais toujours                   |
| <input type="checkbox"/> <sub>1</sub> | <input type="checkbox"/> <sub>2</sub> | <input type="checkbox"/> <sub>3</sub> | <input type="checkbox"/> <sub>4</sub> | <input type="checkbox"/> <sub>5</sub> |

### **Module 3 : Votre diabète et votre alimentation,**

#### **qu'en est-il pour vous ?**

##### **5.A. Faire attention à ce que je mange c'est :**

|                                       |                                       |                                       |                                       |                                       |
|---------------------------------------|---------------------------------------|---------------------------------------|---------------------------------------|---------------------------------------|
| Très difficile pour moi               | Difficile pour moi                    | Ni difficile ni facile pour moi       | Facile pour moi                       | Très facile pour moi                  |
| <input type="checkbox"/> <sub>1</sub> | <input type="checkbox"/> <sub>2</sub> | <input type="checkbox"/> <sub>3</sub> | <input type="checkbox"/> <sub>4</sub> | <input type="checkbox"/> <sub>5</sub> |

##### **5.B. Faire attention à ce que je mange c'est :**

|                                                |                                       |                                                 |                                       |                                        |
|------------------------------------------------|---------------------------------------|-------------------------------------------------|---------------------------------------|----------------------------------------|
| Totalement inutile pour équilibrer mon diabète | Inutile pour équilibrer mon diabète   | Ni inutile ni utile pour équilibrer mon diabète | Utile pour équilibrer mon diabète     | Très utile pour équilibrer mon diabète |
| <input type="checkbox"/> <sub>1</sub>          | <input type="checkbox"/> <sub>2</sub> | <input type="checkbox"/> <sub>3</sub>           | <input type="checkbox"/> <sub>4</sub> | <input type="checkbox"/> <sub>5</sub>  |

##### **5.C. Faire attention à ce que je mange :**

|                                       |                                       |                                       |                                       |                                       |
|---------------------------------------|---------------------------------------|---------------------------------------|---------------------------------------|---------------------------------------|
| Je ne le fais jamais                  | Je le fais rarement                   | Je le fais parfois                    | Je le fais souvent                    | Je le fais toujours                   |
| <input type="checkbox"/> <sub>1</sub> | <input type="checkbox"/> <sub>2</sub> | <input type="checkbox"/> <sub>3</sub> | <input type="checkbox"/> <sub>4</sub> | <input type="checkbox"/> <sub>5</sub> |

##### **6.A. Perdre du poids c'est :**

|                                       |                                       |                                       |                                       |                                       |
|---------------------------------------|---------------------------------------|---------------------------------------|---------------------------------------|---------------------------------------|
| Très difficile pour moi               | Difficile pour moi                    | Ni difficile ni facile pour moi       | Facile pour moi                       | Très facile pour moi                  |
| <input type="checkbox"/> <sub>1</sub> | <input type="checkbox"/> <sub>2</sub> | <input type="checkbox"/> <sub>3</sub> | <input type="checkbox"/> <sub>4</sub> | <input type="checkbox"/> <sub>5</sub> |

##### **6.B. Perdre du poids c'est :**

|                                                |                                       |                                                 |                                       |                                        |
|------------------------------------------------|---------------------------------------|-------------------------------------------------|---------------------------------------|----------------------------------------|
| Totalement inutile pour équilibrer mon diabète | Inutile pour équilibrer mon diabète   | Ni inutile ni utile pour équilibrer mon diabète | Utile pour équilibrer mon diabète     | Très utile pour équilibrer mon diabète |
| <input type="checkbox"/> <sub>1</sub>          | <input type="checkbox"/> <sub>2</sub> | <input type="checkbox"/> <sub>3</sub>           | <input type="checkbox"/> <sub>4</sub> | <input type="checkbox"/> <sub>5</sub>  |

##### **7.A. Eviter les sucreries ou les desserts c'est :**

|                                       |                                       |                                       |                                       |                                       |
|---------------------------------------|---------------------------------------|---------------------------------------|---------------------------------------|---------------------------------------|
| Très difficile pour moi               | Difficile pour moi                    | Ni difficile ni facile pour moi       | Facile pour moi                       | Très facile pour moi                  |
| <input type="checkbox"/> <sub>1</sub> | <input type="checkbox"/> <sub>2</sub> | <input type="checkbox"/> <sub>3</sub> | <input type="checkbox"/> <sub>4</sub> | <input type="checkbox"/> <sub>5</sub> |

##### **7.B. Eviter les sucreries ou les desserts c'est :**

|                                                |                                       |                                                 |                                       |                                        |
|------------------------------------------------|---------------------------------------|-------------------------------------------------|---------------------------------------|----------------------------------------|
| Totalement inutile pour équilibrer mon diabète | Inutile pour équilibrer mon diabète   | Ni inutile ni utile pour équilibrer mon diabète | Utile pour équilibrer mon diabète     | Très utile pour équilibrer mon diabète |
| <input type="checkbox"/> <sub>1</sub>          | <input type="checkbox"/> <sub>2</sub> | <input type="checkbox"/> <sub>3</sub>           | <input type="checkbox"/> <sub>4</sub> | <input type="checkbox"/> <sub>5</sub>  |

##### **7.C. Eviter les sucreries ou les desserts :**

|                                       |                                       |                                       |                                       |                                       |
|---------------------------------------|---------------------------------------|---------------------------------------|---------------------------------------|---------------------------------------|
| Je ne le fais jamais                  | Je le fais rarement                   | Je le fais parfois                    | Je le fais souvent                    | Je le fais toujours                   |
| <input type="checkbox"/> <sub>1</sub> | <input type="checkbox"/> <sub>2</sub> | <input type="checkbox"/> <sub>3</sub> | <input type="checkbox"/> <sub>4</sub> | <input type="checkbox"/> <sub>5</sub> |

##### **8.A. Repérer les aliments riches en graisse et en limiter la consommation c'est :**

|                                       |                                       |                                       |                                       |                                       |
|---------------------------------------|---------------------------------------|---------------------------------------|---------------------------------------|---------------------------------------|
| Très difficile pour moi               | Difficile pour moi                    | Ni difficile ni facile pour moi       | Facile pour moi                       | Très facile pour moi                  |
| <input type="checkbox"/> <sub>1</sub> | <input type="checkbox"/> <sub>2</sub> | <input type="checkbox"/> <sub>3</sub> | <input type="checkbox"/> <sub>4</sub> | <input type="checkbox"/> <sub>5</sub> |

##### **8.B. Repérer les aliments riches en graisse et en limiter la consommation c'est :**

|                                                |                                       |                                                 |                                       |                                        |
|------------------------------------------------|---------------------------------------|-------------------------------------------------|---------------------------------------|----------------------------------------|
| Totalement inutile pour équilibrer mon diabète | Inutile pour équilibrer mon diabète   | Ni inutile ni utile pour équilibrer mon diabète | Utile pour équilibrer mon diabète     | Très utile pour équilibrer mon diabète |
| <input type="checkbox"/> <sub>1</sub>          | <input type="checkbox"/> <sub>2</sub> | <input type="checkbox"/> <sub>3</sub>           | <input type="checkbox"/> <sub>4</sub> | <input type="checkbox"/> <sub>5</sub>  |

##### **8.C. Repérer les aliments riches en graisse et en limiter la consommation :**

|                                       |                                       |                                       |                                       |                                       |
|---------------------------------------|---------------------------------------|---------------------------------------|---------------------------------------|---------------------------------------|
| Je ne le fais jamais                  | Je le fais rarement                   | Je le fais parfois                    | Je le fais souvent                    | Je le fais toujours                   |
| <input type="checkbox"/> <sub>1</sub> | <input type="checkbox"/> <sub>2</sub> | <input type="checkbox"/> <sub>3</sub> | <input type="checkbox"/> <sub>4</sub> | <input type="checkbox"/> <sub>5</sub> |

### Module 3 : Votre diabète et votre alimentation,

#### qu'en est-il pour vous ?

##### 9.A. Diminuer l'alcool des repas c'est :

|                            |                            |                                 |                            |                            |
|----------------------------|----------------------------|---------------------------------|----------------------------|----------------------------|
| Très difficile pour moi    | Difficile pour moi         | Ni difficile ni facile pour moi | Facile pour moi            | Très facile pour moi       |
| <input type="checkbox"/> 1 | <input type="checkbox"/> 2 | <input type="checkbox"/> 3      | <input type="checkbox"/> 4 | <input type="checkbox"/> 5 |

##### 9.B. Diminuer l'alcool des repas c'est :

|                                                |                                     |                                                 |                                   |                                        |
|------------------------------------------------|-------------------------------------|-------------------------------------------------|-----------------------------------|----------------------------------------|
| Totalement inutile pour équilibrer mon diabète | Inutile pour équilibrer mon diabète | Ni inutile ni utile pour équilibrer mon diabète | Utile pour équilibrer mon diabète | Très utile pour équilibrer mon diabète |
| <input type="checkbox"/> 1                     | <input type="checkbox"/> 2          | <input type="checkbox"/> 3                      | <input type="checkbox"/> 4        | <input type="checkbox"/> 5             |

##### 9.C Diminuer l'alcool des repas :

|                            |                            |                            |                            |                            |
|----------------------------|----------------------------|----------------------------|----------------------------|----------------------------|
| Je ne le fais jamais       | Je le fais rarement        | Je le fais parfois         | Je le fais souvent         | Je le fais toujours        |
| <input type="checkbox"/> 1 | <input type="checkbox"/> 2 | <input type="checkbox"/> 3 | <input type="checkbox"/> 4 | <input type="checkbox"/> 5 |

##### 10.A. Manger comme il faut sans que cela me coûte cher c'est :

|                            |                            |                                 |                            |                            |
|----------------------------|----------------------------|---------------------------------|----------------------------|----------------------------|
| Très difficile pour moi    | Difficile pour moi         | Ni difficile ni facile pour moi | Facile pour moi            | Très facile pour moi       |
| <input type="checkbox"/> 1 | <input type="checkbox"/> 2 | <input type="checkbox"/> 3      | <input type="checkbox"/> 4 | <input type="checkbox"/> 5 |

##### 10.B. Manger comme il faut sans que cela me coûte cher c'est :

|                                                |                                     |                                                 |                                   |                                        |
|------------------------------------------------|-------------------------------------|-------------------------------------------------|-----------------------------------|----------------------------------------|
| Totalement inutile pour équilibrer mon diabète | Inutile pour équilibrer mon diabète | Ni inutile ni utile pour équilibrer mon diabète | Utile pour équilibrer mon diabète | Très utile pour équilibrer mon diabète |
| <input type="checkbox"/> 1                     | <input type="checkbox"/> 2          | <input type="checkbox"/> 3                      | <input type="checkbox"/> 4        | <input type="checkbox"/> 5             |

##### 10.C Manger comme il faut sans que cela me coûte cher :

|                            |                            |                            |                            |                            |
|----------------------------|----------------------------|----------------------------|----------------------------|----------------------------|
| Je ne le fais jamais       | Je le fais rarement        | Je le fais parfois         | Je le fais souvent         | Je le fais toujours        |
| <input type="checkbox"/> 1 | <input type="checkbox"/> 2 | <input type="checkbox"/> 3 | <input type="checkbox"/> 4 | <input type="checkbox"/> 5 |

##### 11.A. Limiter les quantités de ce que je mange c'est :

|                            |                            |                                 |                            |                            |
|----------------------------|----------------------------|---------------------------------|----------------------------|----------------------------|
| Très difficile pour moi    | Difficile pour moi         | Ni difficile ni facile pour moi | Facile pour moi            | Très facile pour moi       |
| <input type="checkbox"/> 1 | <input type="checkbox"/> 2 | <input type="checkbox"/> 3      | <input type="checkbox"/> 4 | <input type="checkbox"/> 5 |

##### 11.B. Limiter les quantités de ce que je mange c'est :

|                                                |                                     |                                                 |                                   |                                        |
|------------------------------------------------|-------------------------------------|-------------------------------------------------|-----------------------------------|----------------------------------------|
| Totalement inutile pour équilibrer mon diabète | Inutile pour équilibrer mon diabète | Ni inutile ni utile pour équilibrer mon diabète | Utile pour équilibrer mon diabète | Très utile pour équilibrer mon diabète |
| <input type="checkbox"/> 1                     | <input type="checkbox"/> 2          | <input type="checkbox"/> 3                      | <input type="checkbox"/> 4        | <input type="checkbox"/> 5             |

##### 11.C Limiter les quantités de ce que je mange :

|                            |                            |                            |                            |                            |
|----------------------------|----------------------------|----------------------------|----------------------------|----------------------------|
| Je ne le fais jamais       | Je le fais rarement        | Je le fais parfois         | Je le fais souvent         | Je le fais toujours        |
| <input type="checkbox"/> 1 | <input type="checkbox"/> 2 | <input type="checkbox"/> 3 | <input type="checkbox"/> 4 | <input type="checkbox"/> 5 |

##### 12.A. Supprimer les grignotages entre les repas c'est :

|                            |                            |                                 |                            |                            |
|----------------------------|----------------------------|---------------------------------|----------------------------|----------------------------|
| Très difficile pour moi    | Difficile pour moi         | Ni difficile ni facile pour moi | Facile pour moi            | Très facile pour moi       |
| <input type="checkbox"/> 1 | <input type="checkbox"/> 2 | <input type="checkbox"/> 3      | <input type="checkbox"/> 4 | <input type="checkbox"/> 5 |

##### 12.B. Supprimer les grignotages entre les repas c'est :

|                                                |                                     |                                                 |                                   |                                        |
|------------------------------------------------|-------------------------------------|-------------------------------------------------|-----------------------------------|----------------------------------------|
| Totalement inutile pour équilibrer mon diabète | Inutile pour équilibrer mon diabète | Ni inutile ni utile pour équilibrer mon diabète | Utile pour équilibrer mon diabète | Très utile pour équilibrer mon diabète |
| <input type="checkbox"/> 1                     | <input type="checkbox"/> 2          | <input type="checkbox"/> 3                      | <input type="checkbox"/> 4        | <input type="checkbox"/> 5             |

**Module 3 : Votre diabète et votre alimentation,  
qu'en est-il pour vous ?**

**12.C Supprimer les grignotages entre les repas :**

Je ne le fais jamais ☐<sub>1</sub> Je le fais rarement ☐<sub>2</sub> Je le fais parfois ☐<sub>3</sub> Je le fais souvent ☐<sub>4</sub> Je le fais toujours ☐<sub>5</sub>

**13.A. Accepter de manger sans plaisir c'est :**

Très difficile pour moi ☐<sub>1</sub> Difficile pour moi ☐<sub>2</sub> Ni difficile ni facile pour moi ☐<sub>3</sub> Facile pour moi ☐<sub>4</sub> Très facile pour moi ☐<sub>5</sub>

**13.B. Accepter de manger sans plaisir c'est :**

Totalement inutile pour équilibrer mon diabète ☐<sub>1</sub> Inutile pour équilibrer mon diabète ☐<sub>2</sub> Ni inutile ni utile pour équilibrer mon diabète ☐<sub>3</sub> Utile pour équilibrer mon diabète ☐<sub>4</sub> Très utile pour équilibrer mon diabète ☐<sub>5</sub>

**14.A. Manger comme il faut à midi quand je travaille c'est :**

Très difficile pour moi ☐<sub>1</sub> Difficile pour moi ☐<sub>2</sub> Ni difficile ni facile pour moi ☐<sub>3</sub> Facile pour moi ☐<sub>4</sub> Très facile pour moi ☐<sub>5</sub>

**14.B. Manger comme il faut à midi quand je travaille c'est :**

Totalement inutile pour équilibrer mon diabète ☐<sub>1</sub> Inutile pour équilibrer mon diabète ☐<sub>2</sub> Ni inutile ni utile pour équilibrer mon diabète ☐<sub>3</sub> Utile pour équilibrer mon diabète ☐<sub>4</sub> Très utile pour équilibrer mon diabète ☐<sub>5</sub>

**14.C Manger comme il faut à midi quand je travaille :**

Je ne le fais jamais ☐<sub>1</sub> Je le fais rarement ☐<sub>2</sub> Je le fais parfois ☐<sub>3</sub> Je le fais souvent ☐<sub>4</sub> Je le fais toujours ☐<sub>5</sub>

**15.A. Me limiter quand je suis invité(e) ou que je reçois des invités c'est :**

Très difficile pour moi ☐<sub>1</sub> Difficile pour moi ☐<sub>2</sub> Ni difficile ni facile pour moi ☐<sub>3</sub> Facile pour moi ☐<sub>4</sub> Très facile pour moi ☐<sub>5</sub>

**15.B. Me limiter quand je suis invité(e) ou que je reçois des invités c'est :**

Totalement inutile pour équilibrer mon diabète ☐<sub>1</sub> Inutile pour équilibrer mon diabète ☐<sub>2</sub> Ni inutile ni utile pour équilibrer mon diabète ☐<sub>3</sub> Utile pour équilibrer mon diabète ☐<sub>4</sub> Très utile pour équilibrer mon diabète ☐<sub>5</sub>

**15.C Me limiter quand je suis invité(e) ou que je reçois des invités :**

Je ne le fais jamais ☐<sub>1</sub> Je le fais rarement ☐<sub>2</sub> Je le fais parfois ☐<sub>3</sub> Je le fais souvent ☐<sub>4</sub> Je le fais toujours ☐<sub>5</sub>

**16.A. Faire comprendre aux autres qu'il y a des aliments qui ne sont pas bons pour mon diabète c'est :**

Très difficile pour moi ☐<sub>1</sub> Difficile pour moi ☐<sub>2</sub> Ni difficile ni facile pour moi ☐<sub>3</sub> Facile pour moi ☐<sub>4</sub> Très facile pour moi ☐<sub>5</sub>

**Module 3 : Votre diabète et votre alimentation,**  
**qu'en est-il pour vous ?**

**16.B. Faire comprendre aux autres qu'il y a des aliments qui ne sont pas bons pour mon diabète c'est :**

|                                                |                                       |                                                 |                                       |                                        |
|------------------------------------------------|---------------------------------------|-------------------------------------------------|---------------------------------------|----------------------------------------|
| Totalement inutile pour équilibrer mon diabète | Inutile pour équilibrer mon diabète   | Ni inutile ni utile pour équilibrer mon diabète | Utile pour équilibrer mon diabète     | Très utile pour équilibrer mon diabète |
| <input type="checkbox"/> <sub>1</sub>          | <input type="checkbox"/> <sub>2</sub> | <input type="checkbox"/> <sub>3</sub>           | <input type="checkbox"/> <sub>4</sub> | <input type="checkbox"/> <sub>5</sub>  |

**16.C Faire comprendre aux autres qu'il y a des aliments qui ne sont pas bons pour mon diabète :**

|                                       |                                       |                                       |                                       |                                       |
|---------------------------------------|---------------------------------------|---------------------------------------|---------------------------------------|---------------------------------------|
| Je ne le fais jamais                  | Je le fais rarement                   | Je le fais parfois                    | Je le fais souvent                    | Je le fais toujours                   |
| <input type="checkbox"/> <sub>1</sub> | <input type="checkbox"/> <sub>2</sub> | <input type="checkbox"/> <sub>3</sub> | <input type="checkbox"/> <sub>4</sub> | <input type="checkbox"/> <sub>5</sub> |

**17.A. Refuser de la nourriture déconseillée pour mon diabète quand je suis invité(e) c'est :**

|                                       |                                       |                                       |                                       |                                       |
|---------------------------------------|---------------------------------------|---------------------------------------|---------------------------------------|---------------------------------------|
| Très difficile pour moi               | Difficile pour moi                    | Ni difficile ni facile pour moi       | Facile pour moi                       | Très facile pour moi                  |
| <input type="checkbox"/> <sub>1</sub> | <input type="checkbox"/> <sub>2</sub> | <input type="checkbox"/> <sub>3</sub> | <input type="checkbox"/> <sub>4</sub> | <input type="checkbox"/> <sub>5</sub> |

**17.B. Refuser de la nourriture déconseillée pour mon diabète quand je suis invité(e) c'est :**

|                                                |                                       |                                                 |                                       |                                        |
|------------------------------------------------|---------------------------------------|-------------------------------------------------|---------------------------------------|----------------------------------------|
| Totalement inutile pour équilibrer mon diabète | Inutile pour équilibrer mon diabète   | Ni inutile ni utile pour équilibrer mon diabète | Utile pour équilibrer mon diabète     | Très utile pour équilibrer mon diabète |
| <input type="checkbox"/> <sub>1</sub>          | <input type="checkbox"/> <sub>2</sub> | <input type="checkbox"/> <sub>3</sub>           | <input type="checkbox"/> <sub>4</sub> | <input type="checkbox"/> <sub>5</sub>  |

**17.C Refuser de la nourriture déconseillée pour mon diabète quand je suis invité(e) :**

|                                       |                                       |                                       |                                       |                                       |
|---------------------------------------|---------------------------------------|---------------------------------------|---------------------------------------|---------------------------------------|
| Je ne le fais jamais                  | Je le fais rarement                   | Je le fais parfois                    | Je le fais souvent                    | Je le fais toujours                   |
| <input type="checkbox"/> <sub>1</sub> | <input type="checkbox"/> <sub>2</sub> | <input type="checkbox"/> <sub>3</sub> | <input type="checkbox"/> <sub>4</sub> | <input type="checkbox"/> <sub>5</sub> |

**18.A. Refuser un deuxième apéritif ou un verre de trop quand je suis invité(e) c'est :**

|                                       |                                       |                                       |                                       |                                       |
|---------------------------------------|---------------------------------------|---------------------------------------|---------------------------------------|---------------------------------------|
| Très difficile pour moi               | Difficile pour moi                    | Ni difficile ni facile pour moi       | Facile pour moi                       | Très facile pour moi                  |
| <input type="checkbox"/> <sub>1</sub> | <input type="checkbox"/> <sub>2</sub> | <input type="checkbox"/> <sub>3</sub> | <input type="checkbox"/> <sub>4</sub> | <input type="checkbox"/> <sub>5</sub> |

**18.B. Refuser un deuxième apéritif ou un verre de trop quand je suis invité(e) c'est :**

|                                                |                                       |                                                 |                                       |                                        |
|------------------------------------------------|---------------------------------------|-------------------------------------------------|---------------------------------------|----------------------------------------|
| Totalement inutile pour équilibrer mon diabète | Inutile pour équilibrer mon diabète   | Ni inutile ni utile pour équilibrer mon diabète | Utile pour équilibrer mon diabète     | Très utile pour équilibrer mon diabète |
| <input type="checkbox"/> <sub>1</sub>          | <input type="checkbox"/> <sub>2</sub> | <input type="checkbox"/> <sub>3</sub>           | <input type="checkbox"/> <sub>4</sub> | <input type="checkbox"/> <sub>5</sub>  |

**18.C Refuser un deuxième apéritif ou un verre de trop quand je suis invité(e) :**

|                                       |                                       |                                       |                                       |                                       |
|---------------------------------------|---------------------------------------|---------------------------------------|---------------------------------------|---------------------------------------|
| Je ne le fais jamais                  | Je le fais rarement                   | Je le fais parfois                    | Je le fais souvent                    | Je le fais toujours                   |
| <input type="checkbox"/> <sub>1</sub> | <input type="checkbox"/> <sub>2</sub> | <input type="checkbox"/> <sub>3</sub> | <input type="checkbox"/> <sub>4</sub> | <input type="checkbox"/> <sub>5</sub> |

**19.A. Préparer des repas adaptés pour mon diabète c'est :**

|                                       |                                       |                                       |                                       |                                       |
|---------------------------------------|---------------------------------------|---------------------------------------|---------------------------------------|---------------------------------------|
| Très difficile pour moi               | Difficile pour moi                    | Ni difficile ni facile pour moi       | Facile pour moi                       | Très facile pour moi                  |
| <input type="checkbox"/> <sub>1</sub> | <input type="checkbox"/> <sub>2</sub> | <input type="checkbox"/> <sub>3</sub> | <input type="checkbox"/> <sub>4</sub> | <input type="checkbox"/> <sub>5</sub> |

**19.B. Préparer des repas adaptés pour mon diabète c'est :**

|                                                |                                       |                                                 |                                       |                                        |
|------------------------------------------------|---------------------------------------|-------------------------------------------------|---------------------------------------|----------------------------------------|
| Totalement inutile pour équilibrer mon diabète | Inutile pour équilibrer mon diabète   | Ni inutile ni utile pour équilibrer mon diabète | Utile pour équilibrer mon diabète     | Très utile pour équilibrer mon diabète |
| <input type="checkbox"/> <sub>1</sub>          | <input type="checkbox"/> <sub>2</sub> | <input type="checkbox"/> <sub>3</sub>           | <input type="checkbox"/> <sub>4</sub> | <input type="checkbox"/> <sub>5</sub>  |

**19.C Préparer des repas adaptés pour mon diabète :**

|                                       |                                       |                                       |                                       |                                       |
|---------------------------------------|---------------------------------------|---------------------------------------|---------------------------------------|---------------------------------------|
| Je ne le fais jamais                  | Je le fais rarement                   | Je le fais parfois                    | Je le fais souvent                    | Je le fais toujours                   |
| <input type="checkbox"/> <sub>1</sub> | <input type="checkbox"/> <sub>2</sub> | <input type="checkbox"/> <sub>3</sub> | <input type="checkbox"/> <sub>4</sub> | <input type="checkbox"/> <sub>5</sub> |

**Module 3 : Votre diabète et votre alimentation,  
qu'en est-il pour vous ?**

**20.A. Manger différemment des autres c'est :**

|                                       |                                       |                                       |                                       |                                       |
|---------------------------------------|---------------------------------------|---------------------------------------|---------------------------------------|---------------------------------------|
| Très difficile pour moi               | Difficile pour moi                    | Ni difficile ni facile pour moi       | Facile pour moi                       | Très facile pour moi                  |
| <input type="checkbox"/> <sub>1</sub> | <input type="checkbox"/> <sub>2</sub> | <input type="checkbox"/> <sub>3</sub> | <input type="checkbox"/> <sub>4</sub> | <input type="checkbox"/> <sub>5</sub> |

**20.B. Manger différemment des autres c'est :**

|                                                |                                       |                                                 |                                       |                                        |
|------------------------------------------------|---------------------------------------|-------------------------------------------------|---------------------------------------|----------------------------------------|
| Totalement inutile pour équilibrer mon diabète | Inutile pour équilibrer mon diabète   | Ni inutile ni utile pour équilibrer mon diabète | Utile pour équilibrer mon diabète     | Très utile pour équilibrer mon diabète |
| <input type="checkbox"/> <sub>1</sub>          | <input type="checkbox"/> <sub>2</sub> | <input type="checkbox"/> <sub>3</sub>           | <input type="checkbox"/> <sub>4</sub> | <input type="checkbox"/> <sub>5</sub>  |

**20.C Manger différemment des autres :**

|                                       |                                       |                                       |                                       |                                       |
|---------------------------------------|---------------------------------------|---------------------------------------|---------------------------------------|---------------------------------------|
| Je ne le fais jamais                  | Je le fais rarement                   | Je le fais parfois                    | Je le fais souvent                    | Je le fais toujours                   |
| <input type="checkbox"/> <sub>1</sub> | <input type="checkbox"/> <sub>2</sub> | <input type="checkbox"/> <sub>3</sub> | <input type="checkbox"/> <sub>4</sub> | <input type="checkbox"/> <sub>5</sub> |

**21.A. Changer mes habitudes alimentaires c'est :**

|                                       |                                       |                                       |                                       |                                       |
|---------------------------------------|---------------------------------------|---------------------------------------|---------------------------------------|---------------------------------------|
| Très difficile pour moi               | Difficile pour moi                    | Ni difficile ni facile pour moi       | Facile pour moi                       | Très facile pour moi                  |
| <input type="checkbox"/> <sub>1</sub> | <input type="checkbox"/> <sub>2</sub> | <input type="checkbox"/> <sub>3</sub> | <input type="checkbox"/> <sub>4</sub> | <input type="checkbox"/> <sub>5</sub> |

**21.B. Changer mes habitudes alimentaires c'est :**

|                                                |                                       |                                                 |                                       |                                        |
|------------------------------------------------|---------------------------------------|-------------------------------------------------|---------------------------------------|----------------------------------------|
| Totalement inutile pour équilibrer mon diabète | Inutile pour équilibrer mon diabète   | Ni inutile ni utile pour équilibrer mon diabète | Utile pour équilibrer mon diabète     | Très utile pour équilibrer mon diabète |
| <input type="checkbox"/> <sub>1</sub>          | <input type="checkbox"/> <sub>2</sub> | <input type="checkbox"/> <sub>3</sub>           | <input type="checkbox"/> <sub>4</sub> | <input type="checkbox"/> <sub>5</sub>  |

Un traitement de vos données personnelles va être mis en œuvre pour permettre d'analyser les résultats de l'étude observationnelle à laquelle vous participez. A cette fin, les données médicales vous concernant et les données relatives à vos habitudes de vie seront transmises au Promoteur de la recherche ou aux personnes ou sociétés agissant pour son compte, en France. Ces données pourront également, dans des conditions assurant leur confidentialité, être transmises aux autorités de santé françaises ou étrangères, à d'autres entités du Promoteur. Conformément aux dispositions de loi relative à l'informatique aux fichiers et aux libertés, vous disposez d'un droit d'accès et de rectification. Vous disposez également d'un droit d'opposition à la transmission des données couvertes par le secret professionnel susceptibles d'être utilisées dans le cadre de cette recherche et d'être traitées. Vous pouvez également accéder directement ou par l'intermédiaire d'un médecin de votre choix à l'ensemble de vos données médicales en application des dispositions de l'article L 1111-7 du Code de la Santé Publique. Ces droits s'exercent auprès du médecin qui vous suit dans le cadre de la recherche et qui connaît votre identité.

**Module 4 : Connaissance du diabète,**  
**qu'en est-il pour vous ?**

Pour chacune des affirmations suivantes veuillez indiquer si pour vous c'est plus ou moins facile et si c'est utile pour équilibrer votre diabète. Pour cela, veuillez cocher la case correspondant à votre réponse.

**1.A. Comprendre pourquoi je suis diabétique c'est :**

|                                       |                                       |                                       |                                       |                                       |
|---------------------------------------|---------------------------------------|---------------------------------------|---------------------------------------|---------------------------------------|
| Très difficile pour moi               | Difficile pour moi                    | Ni difficile ni facile pour moi       | Facile pour moi                       | Très facile pour moi                  |
| <input type="checkbox"/> <sub>1</sub> | <input type="checkbox"/> <sub>2</sub> | <input type="checkbox"/> <sub>3</sub> | <input type="checkbox"/> <sub>4</sub> | <input type="checkbox"/> <sub>5</sub> |

**1.B. Comprendre pourquoi je suis diabétique c'est :**

|                                                |                                       |                                                 |                                       |                                        |
|------------------------------------------------|---------------------------------------|-------------------------------------------------|---------------------------------------|----------------------------------------|
| Totalement inutile pour équilibrer mon diabète | Inutile pour équilibrer mon diabète   | Ni inutile ni utile pour équilibrer mon diabète | Utile pour équilibrer mon diabète     | Très utile pour équilibrer mon diabète |
| <input type="checkbox"/> <sub>1</sub>          | <input type="checkbox"/> <sub>2</sub> | <input type="checkbox"/> <sub>3</sub>           | <input type="checkbox"/> <sub>4</sub> | <input type="checkbox"/> <sub>5</sub>  |

**2.A. Comprendre comment ma glycémie varie c'est :**

|                                       |                                       |                                       |                                       |                                       |
|---------------------------------------|---------------------------------------|---------------------------------------|---------------------------------------|---------------------------------------|
| Très difficile pour moi               | Difficile pour moi                    | Ni difficile ni facile pour moi       | Facile pour moi                       | Très facile pour moi                  |
| <input type="checkbox"/> <sub>1</sub> | <input type="checkbox"/> <sub>2</sub> | <input type="checkbox"/> <sub>3</sub> | <input type="checkbox"/> <sub>4</sub> | <input type="checkbox"/> <sub>5</sub> |

**2.B. Comprendre comment ma glycémie varie c'est :**

|                                                |                                       |                                                 |                                       |                                        |
|------------------------------------------------|---------------------------------------|-------------------------------------------------|---------------------------------------|----------------------------------------|
| Totalement inutile pour équilibrer mon diabète | Inutile pour équilibrer mon diabète   | Ni inutile ni utile pour équilibrer mon diabète | Utile pour équilibrer mon diabète     | Très utile pour équilibrer mon diabète |
| <input type="checkbox"/> <sub>1</sub>          | <input type="checkbox"/> <sub>2</sub> | <input type="checkbox"/> <sub>3</sub>           | <input type="checkbox"/> <sub>4</sub> | <input type="checkbox"/> <sub>5</sub>  |

**3.A. Faire baisser mon taux de sucre dans le sang c'est :**

|                                       |                                       |                                       |                                       |                                       |
|---------------------------------------|---------------------------------------|---------------------------------------|---------------------------------------|---------------------------------------|
| Très difficile pour moi               | Difficile pour moi                    | Ni difficile ni facile pour moi       | Facile pour moi                       | Très facile pour moi                  |
| <input type="checkbox"/> <sub>1</sub> | <input type="checkbox"/> <sub>2</sub> | <input type="checkbox"/> <sub>3</sub> | <input type="checkbox"/> <sub>4</sub> | <input type="checkbox"/> <sub>5</sub> |

**3.B. Faire baisser mon taux de sucre dans le sang c'est :**

|                                                |                                       |                                                 |                                       |                                        |
|------------------------------------------------|---------------------------------------|-------------------------------------------------|---------------------------------------|----------------------------------------|
| Totalement inutile pour équilibrer mon diabète | Inutile pour équilibrer mon diabète   | Ni inutile ni utile pour équilibrer mon diabète | Utile pour équilibrer mon diabète     | Très utile pour équilibrer mon diabète |
| <input type="checkbox"/> <sub>1</sub>          | <input type="checkbox"/> <sub>2</sub> | <input type="checkbox"/> <sub>3</sub>           | <input type="checkbox"/> <sub>4</sub> | <input type="checkbox"/> <sub>5</sub>  |

**3.C Faire baisser mon taux de sucre dans le sang :**

|                                       |                                       |                                       |                                       |                                       |
|---------------------------------------|---------------------------------------|---------------------------------------|---------------------------------------|---------------------------------------|
| Je ne le fais jamais                  | Je le fais rarement                   | Je le fais parfois                    | Je le fais souvent                    | Je le fais toujours                   |
| <input type="checkbox"/> <sub>1</sub> | <input type="checkbox"/> <sub>2</sub> | <input type="checkbox"/> <sub>3</sub> | <input type="checkbox"/> <sub>4</sub> | <input type="checkbox"/> <sub>5</sub> |

**4.A. Connaître les complications du diabète c'est :**

|                                       |                                       |                                       |                                       |                                       |
|---------------------------------------|---------------------------------------|---------------------------------------|---------------------------------------|---------------------------------------|
| Très difficile pour moi               | Difficile pour moi                    | Ni difficile ni facile pour moi       | Facile pour moi                       | Très facile pour moi                  |
| <input type="checkbox"/> <sub>1</sub> | <input type="checkbox"/> <sub>2</sub> | <input type="checkbox"/> <sub>3</sub> | <input type="checkbox"/> <sub>4</sub> | <input type="checkbox"/> <sub>5</sub> |

**4.B. Connaître les complications du diabète c'est :**

|                                                |                                       |                                                 |                                       |                                        |
|------------------------------------------------|---------------------------------------|-------------------------------------------------|---------------------------------------|----------------------------------------|
| Totalement inutile pour équilibrer mon diabète | Inutile pour équilibrer mon diabète   | Ni inutile ni utile pour équilibrer mon diabète | Utile pour équilibrer mon diabète     | Très utile pour équilibrer mon diabète |
| <input type="checkbox"/> <sub>1</sub>          | <input type="checkbox"/> <sub>2</sub> | <input type="checkbox"/> <sub>3</sub>           | <input type="checkbox"/> <sub>4</sub> | <input type="checkbox"/> <sub>5</sub>  |

**Module 4 : Connaissance du diabète,  
qu'en est-il pour vous ?**

**5.A. Comprendre comment se protéger des complications du diabète c'est :**

|                                       |                                       |                                       |                                       |                                       |
|---------------------------------------|---------------------------------------|---------------------------------------|---------------------------------------|---------------------------------------|
| Très difficile pour moi               | Difficile pour moi                    | Ni difficile ni facile pour moi       | Facile pour moi                       | Très facile pour moi                  |
| <input type="checkbox"/> <sub>1</sub> | <input type="checkbox"/> <sub>2</sub> | <input type="checkbox"/> <sub>3</sub> | <input type="checkbox"/> <sub>4</sub> | <input type="checkbox"/> <sub>5</sub> |

**5.B. Comprendre comment se protéger des complications du diabète c'est :**

|                                                |                                       |                                                 |                                       |                                        |
|------------------------------------------------|---------------------------------------|-------------------------------------------------|---------------------------------------|----------------------------------------|
| Totalement inutile pour équilibrer mon diabète | Inutile pour équilibrer mon diabète   | Ni inutile ni utile pour équilibrer mon diabète | Utile pour équilibrer mon diabète     | Très utile pour équilibrer mon diabète |
| <input type="checkbox"/> <sub>1</sub>          | <input type="checkbox"/> <sub>2</sub> | <input type="checkbox"/> <sub>3</sub>           | <input type="checkbox"/> <sub>4</sub> | <input type="checkbox"/> <sub>5</sub>  |

**6.A. Comprendre le rôle de l'insuline c'est :**

|                                       |                                       |                                       |                                       |                                       |
|---------------------------------------|---------------------------------------|---------------------------------------|---------------------------------------|---------------------------------------|
| Très difficile pour moi               | Difficile pour moi                    | Ni difficile ni facile pour moi       | Facile pour moi                       | Très facile pour moi                  |
| <input type="checkbox"/> <sub>1</sub> | <input type="checkbox"/> <sub>2</sub> | <input type="checkbox"/> <sub>3</sub> | <input type="checkbox"/> <sub>4</sub> | <input type="checkbox"/> <sub>5</sub> |

**6.B. Comprendre le rôle de l'insuline c'est :**

|                                                |                                       |                                                 |                                       |                                        |
|------------------------------------------------|---------------------------------------|-------------------------------------------------|---------------------------------------|----------------------------------------|
| Totalement inutile pour équilibrer mon diabète | Inutile pour équilibrer mon diabète   | Ni inutile ni utile pour équilibrer mon diabète | Utile pour équilibrer mon diabète     | Très utile pour équilibrer mon diabète |
| <input type="checkbox"/> <sub>1</sub>          | <input type="checkbox"/> <sub>2</sub> | <input type="checkbox"/> <sub>3</sub>           | <input type="checkbox"/> <sub>4</sub> | <input type="checkbox"/> <sub>5</sub>  |

**7.A. Connaître mon taux d'hémoglobine glyquée ou HbA1c c'est :**

|                                       |                                       |                                       |                                       |                                       |
|---------------------------------------|---------------------------------------|---------------------------------------|---------------------------------------|---------------------------------------|
| Très difficile pour moi               | Difficile pour moi                    | Ni difficile ni facile pour moi       | Facile pour moi                       | Très facile pour moi                  |
| <input type="checkbox"/> <sub>1</sub> | <input type="checkbox"/> <sub>2</sub> | <input type="checkbox"/> <sub>3</sub> | <input type="checkbox"/> <sub>4</sub> | <input type="checkbox"/> <sub>5</sub> |

**7.B. Connaître mon taux d'hémoglobine glyquée ou HbA1c c'est :**

|                                                |                                       |                                                 |                                       |                                        |
|------------------------------------------------|---------------------------------------|-------------------------------------------------|---------------------------------------|----------------------------------------|
| Totalement inutile pour équilibrer mon diabète | Inutile pour équilibrer mon diabète   | Ni inutile ni utile pour équilibrer mon diabète | Utile pour équilibrer mon diabète     | Très utile pour équilibrer mon diabète |
| <input type="checkbox"/> <sub>1</sub>          | <input type="checkbox"/> <sub>2</sub> | <input type="checkbox"/> <sub>3</sub>           | <input type="checkbox"/> <sub>4</sub> | <input type="checkbox"/> <sub>5</sub>  |

**8.A. Connaître mon objectif d'hémoglobine glyquée ou HbA1c c'est :**

|                                       |                                       |                                       |                                       |                                       |
|---------------------------------------|---------------------------------------|---------------------------------------|---------------------------------------|---------------------------------------|
| Très difficile pour moi               | Difficile pour moi                    | Ni difficile ni facile pour moi       | Facile pour moi                       | Très facile pour moi                  |
| <input type="checkbox"/> <sub>1</sub> | <input type="checkbox"/> <sub>2</sub> | <input type="checkbox"/> <sub>3</sub> | <input type="checkbox"/> <sub>4</sub> | <input type="checkbox"/> <sub>5</sub> |

**8.B. Connaître mon objectif d'hémoglobine glyquée ou HbA1c c'est :**

|                                                |                                       |                                                 |                                       |                                        |
|------------------------------------------------|---------------------------------------|-------------------------------------------------|---------------------------------------|----------------------------------------|
| Totalement inutile pour équilibrer mon diabète | Inutile pour équilibrer mon diabète   | Ni inutile ni utile pour équilibrer mon diabète | Utile pour équilibrer mon diabète     | Très utile pour équilibrer mon diabète |
| <input type="checkbox"/> <sub>1</sub>          | <input type="checkbox"/> <sub>2</sub> | <input type="checkbox"/> <sub>3</sub>           | <input type="checkbox"/> <sub>4</sub> | <input type="checkbox"/> <sub>5</sub>  |

**9.A. Connaître mon taux de mauvais cholestérol (cholestérol LDL) c'est :**

|                                       |                                       |                                       |                                       |                                       |
|---------------------------------------|---------------------------------------|---------------------------------------|---------------------------------------|---------------------------------------|
| Très difficile pour moi               | Difficile pour moi                    | Ni difficile ni facile pour moi       | Facile pour moi                       | Très facile pour moi                  |
| <input type="checkbox"/> <sub>1</sub> | <input type="checkbox"/> <sub>2</sub> | <input type="checkbox"/> <sub>3</sub> | <input type="checkbox"/> <sub>4</sub> | <input type="checkbox"/> <sub>5</sub> |

**Module 4 : Connaissance du diabète,  
qu'en est-il pour vous ?**

**9.B. Connaître mon taux de mauvais cholestérol (cholestérol LDL) c'est :**

|                                                      |                                           |                                                       |                                       |                                              |
|------------------------------------------------------|-------------------------------------------|-------------------------------------------------------|---------------------------------------|----------------------------------------------|
| Totalement inutile<br>pour équilibrer mon<br>diabète | Inutile pour<br>équilibrer mon<br>diabète | Ni inutile ni utile<br>pour équilibrer mon<br>diabète | Utile pour équilibrer<br>mon diabète  | Très utile pour<br>équilibrer mon<br>diabète |
| <input type="checkbox"/> <sub>1</sub>                | <input type="checkbox"/> <sub>2</sub>     | <input type="checkbox"/> <sub>3</sub>                 | <input type="checkbox"/> <sub>4</sub> | <input type="checkbox"/> <sub>5</sub>        |

**10.A. Connaître mon objectif de mauvais cholestérol (cholestérol LDL) c'est :**

|                                       |                                       |                                       |                                       |                                       |
|---------------------------------------|---------------------------------------|---------------------------------------|---------------------------------------|---------------------------------------|
| Très difficile pour<br>moi            | Difficile pour moi                    | Ni difficile ni facile<br>pour moi    | Facile pour moi                       | Très facile pour moi                  |
| <input type="checkbox"/> <sub>1</sub> | <input type="checkbox"/> <sub>2</sub> | <input type="checkbox"/> <sub>3</sub> | <input type="checkbox"/> <sub>4</sub> | <input type="checkbox"/> <sub>5</sub> |

**10.B. Connaître mon objectif de mauvais cholestérol (cholestérol LDL) c'est :**

|                                                      |                                           |                                                       |                                       |                                              |
|------------------------------------------------------|-------------------------------------------|-------------------------------------------------------|---------------------------------------|----------------------------------------------|
| Totalement inutile<br>pour équilibrer mon<br>diabète | Inutile pour<br>équilibrer mon<br>diabète | Ni inutile ni utile<br>pour équilibrer mon<br>diabète | Utile pour équilibrer<br>mon diabète  | Très utile pour<br>équilibrer mon<br>diabète |
| <input type="checkbox"/> <sub>1</sub>                | <input type="checkbox"/> <sub>2</sub>     | <input type="checkbox"/> <sub>3</sub>                 | <input type="checkbox"/> <sub>4</sub> | <input type="checkbox"/> <sub>5</sub>        |

**11.A. Connaître ma pression artérielle c'est :**

|                                       |                                       |                                       |                                       |                                       |
|---------------------------------------|---------------------------------------|---------------------------------------|---------------------------------------|---------------------------------------|
| Très difficile pour<br>moi            | Difficile pour moi                    | Ni difficile ni facile<br>pour moi    | Facile pour moi                       | Très facile pour moi                  |
| <input type="checkbox"/> <sub>1</sub> | <input type="checkbox"/> <sub>2</sub> | <input type="checkbox"/> <sub>3</sub> | <input type="checkbox"/> <sub>4</sub> | <input type="checkbox"/> <sub>5</sub> |

**11.B. Connaître ma pression artérielle c'est :**

|                                                      |                                           |                                                       |                                       |                                              |
|------------------------------------------------------|-------------------------------------------|-------------------------------------------------------|---------------------------------------|----------------------------------------------|
| Totalement inutile<br>pour équilibrer mon<br>diabète | Inutile pour<br>équilibrer mon<br>diabète | Ni inutile ni utile<br>pour équilibrer mon<br>diabète | Utile pour équilibrer<br>mon diabète  | Très utile pour<br>équilibrer mon<br>diabète |
| <input type="checkbox"/> <sub>1</sub>                | <input type="checkbox"/> <sub>2</sub>     | <input type="checkbox"/> <sub>3</sub>                 | <input type="checkbox"/> <sub>4</sub> | <input type="checkbox"/> <sub>5</sub>        |

**12.A. Connaître mon objectif de pression artérielle c'est :**

|                                       |                                       |                                       |                                       |                                       |
|---------------------------------------|---------------------------------------|---------------------------------------|---------------------------------------|---------------------------------------|
| Très difficile pour<br>moi            | Difficile pour moi                    | Ni difficile ni facile<br>pour moi    | Facile pour moi                       | Très facile pour moi                  |
| <input type="checkbox"/> <sub>1</sub> | <input type="checkbox"/> <sub>2</sub> | <input type="checkbox"/> <sub>3</sub> | <input type="checkbox"/> <sub>4</sub> | <input type="checkbox"/> <sub>5</sub> |

**12.B. Connaître mon objectif de pression artérielle c'est :**

|                                                      |                                           |                                                       |                                       |                                              |
|------------------------------------------------------|-------------------------------------------|-------------------------------------------------------|---------------------------------------|----------------------------------------------|
| Totalement inutile<br>pour équilibrer mon<br>diabète | Inutile pour<br>équilibrer mon<br>diabète | Ni inutile ni utile<br>pour équilibrer mon<br>diabète | Utile pour équilibrer<br>mon diabète  | Très utile pour<br>équilibrer mon<br>diabète |
| <input type="checkbox"/> <sub>1</sub>                | <input type="checkbox"/> <sub>2</sub>     | <input type="checkbox"/> <sub>3</sub>                 | <input type="checkbox"/> <sub>4</sub> | <input type="checkbox"/> <sub>5</sub>        |

Un traitement de vos données personnelles va être mis en œuvre pour permettre d'analyser les résultats de l'étude observationnelle à laquelle vous participez. A cette fin, les données médicales vous concernant et les données relatives à vos habitudes de vie seront transmises au Promoteur de la recherche ou aux personnes ou sociétés agissant pour son compte, en France. Ces données pourront également, dans des conditions assurant leur confidentialité, être transmises aux autorités de santé françaises ou étrangères, à d'autres entités du Promoteur. Conformément aux dispositions de loi relative à l'informatique aux fichiers et aux libertés, vous disposez d'un droit d'accès et de rectification. Vous disposez également d'un droit d'opposition à la transmission des données couvertes par le secret professionnel susceptibles d'être utilisées dans le cadre de cette recherche et d'être traitées. Vous pouvez également accéder directement ou par l'intermédiaire d'un médecin de votre choix à l'ensemble de vos données médicales en application des dispositions de l'article L 1111-7 du Code de la Santé Publique. Ces droits s'exercent auprès du médecin qui vous suit dans le cadre de la recherche et qui connaît votre identité.

## Module 5 : La mesure de la glycémie, qu'en est-il pour vous ?

Pour chacune des actions suivantes veuillez indiquer si pour vous cette action est plus ou moins facile, si c'est utile pour équilibrer votre diabète et à quelle fréquence vous la faites. Pour cela, veuillez cocher la case correspondant le mieux à votre réponse.

### 1.A. Mesurer ma glycémie au bout du doigt c'est :

|                                                       |                                                  |                                                               |                                               |                                                    |
|-------------------------------------------------------|--------------------------------------------------|---------------------------------------------------------------|-----------------------------------------------|----------------------------------------------------|
| Très difficile pour moi<br><input type="checkbox"/> 1 | Difficile pour moi<br><input type="checkbox"/> 2 | Ni difficile ni facile pour moi<br><input type="checkbox"/> 3 | Facile pour moi<br><input type="checkbox"/> 4 | Très facile pour moi<br><input type="checkbox"/> 5 |
|-------------------------------------------------------|--------------------------------------------------|---------------------------------------------------------------|-----------------------------------------------|----------------------------------------------------|

### 1.B. Mesurer ma glycémie au bout du doigt c'est :

|                                                                              |                                                                   |                                                                               |                                                                 |                                                                      |
|------------------------------------------------------------------------------|-------------------------------------------------------------------|-------------------------------------------------------------------------------|-----------------------------------------------------------------|----------------------------------------------------------------------|
| Totalement inutile pour équilibrer mon diabète<br><input type="checkbox"/> 1 | Inutile pour équilibrer mon diabète<br><input type="checkbox"/> 2 | Ni inutile ni utile pour équilibrer mon diabète<br><input type="checkbox"/> 3 | Utile pour équilibrer mon diabète<br><input type="checkbox"/> 4 | Très utile pour équilibrer mon diabète<br><input type="checkbox"/> 5 |
|------------------------------------------------------------------------------|-------------------------------------------------------------------|-------------------------------------------------------------------------------|-----------------------------------------------------------------|----------------------------------------------------------------------|

### 1.C Mesurer ma glycémie au bout du doigt :

|                                                    |                                                   |                                                  |                                                  |                                                   |
|----------------------------------------------------|---------------------------------------------------|--------------------------------------------------|--------------------------------------------------|---------------------------------------------------|
| Je ne le fais jamais<br><input type="checkbox"/> 1 | Je le fais rarement<br><input type="checkbox"/> 2 | Je le fais parfois<br><input type="checkbox"/> 3 | Je le fais souvent<br><input type="checkbox"/> 4 | Je le fais toujours<br><input type="checkbox"/> 5 |
|----------------------------------------------------|---------------------------------------------------|--------------------------------------------------|--------------------------------------------------|---------------------------------------------------|

### 2.A. Mesurer ma glycémie au bout du doigt quand je ne suis pas chez moi c'est :

|                                                       |                                                  |                                                               |                                               |                                                    |
|-------------------------------------------------------|--------------------------------------------------|---------------------------------------------------------------|-----------------------------------------------|----------------------------------------------------|
| Très difficile pour moi<br><input type="checkbox"/> 1 | Difficile pour moi<br><input type="checkbox"/> 2 | Ni difficile ni facile pour moi<br><input type="checkbox"/> 3 | Facile pour moi<br><input type="checkbox"/> 4 | Très facile pour moi<br><input type="checkbox"/> 5 |
|-------------------------------------------------------|--------------------------------------------------|---------------------------------------------------------------|-----------------------------------------------|----------------------------------------------------|

### 2.B. Mesurer ma glycémie au bout du doigt quand je ne suis pas chez moi c'est :

|                                                                              |                                                                   |                                                                               |                                                                 |                                                                      |
|------------------------------------------------------------------------------|-------------------------------------------------------------------|-------------------------------------------------------------------------------|-----------------------------------------------------------------|----------------------------------------------------------------------|
| Totalement inutile pour équilibrer mon diabète<br><input type="checkbox"/> 1 | Inutile pour équilibrer mon diabète<br><input type="checkbox"/> 2 | Ni inutile ni utile pour équilibrer mon diabète<br><input type="checkbox"/> 3 | Utile pour équilibrer mon diabète<br><input type="checkbox"/> 4 | Très utile pour équilibrer mon diabète<br><input type="checkbox"/> 5 |
|------------------------------------------------------------------------------|-------------------------------------------------------------------|-------------------------------------------------------------------------------|-----------------------------------------------------------------|----------------------------------------------------------------------|

### 2.C Mesurer ma glycémie au bout du doigt quand je ne suis pas chez moi :

|                                                    |                                                   |                                                  |                                                  |                                                   |
|----------------------------------------------------|---------------------------------------------------|--------------------------------------------------|--------------------------------------------------|---------------------------------------------------|
| Je ne le fais jamais<br><input type="checkbox"/> 1 | Je le fais rarement<br><input type="checkbox"/> 2 | Je le fais parfois<br><input type="checkbox"/> 3 | Je le fais souvent<br><input type="checkbox"/> 4 | Je le fais toujours<br><input type="checkbox"/> 5 |
|----------------------------------------------------|---------------------------------------------------|--------------------------------------------------|--------------------------------------------------|---------------------------------------------------|

### 3.A. Mesurer ma glycémie après les repas c'est :

|                                                       |                                                  |                                                               |                                               |                                                    |
|-------------------------------------------------------|--------------------------------------------------|---------------------------------------------------------------|-----------------------------------------------|----------------------------------------------------|
| Très difficile pour moi<br><input type="checkbox"/> 1 | Difficile pour moi<br><input type="checkbox"/> 2 | Ni difficile ni facile pour moi<br><input type="checkbox"/> 3 | Facile pour moi<br><input type="checkbox"/> 4 | Très facile pour moi<br><input type="checkbox"/> 5 |
|-------------------------------------------------------|--------------------------------------------------|---------------------------------------------------------------|-----------------------------------------------|----------------------------------------------------|

### 3.B. Mesurer ma glycémie après les repas c'est :

|                                                                              |                                                                   |                                                                               |                                                                 |                                                                      |
|------------------------------------------------------------------------------|-------------------------------------------------------------------|-------------------------------------------------------------------------------|-----------------------------------------------------------------|----------------------------------------------------------------------|
| Totalement inutile pour équilibrer mon diabète<br><input type="checkbox"/> 1 | Inutile pour équilibrer mon diabète<br><input type="checkbox"/> 2 | Ni inutile ni utile pour équilibrer mon diabète<br><input type="checkbox"/> 3 | Utile pour équilibrer mon diabète<br><input type="checkbox"/> 4 | Très utile pour équilibrer mon diabète<br><input type="checkbox"/> 5 |
|------------------------------------------------------------------------------|-------------------------------------------------------------------|-------------------------------------------------------------------------------|-----------------------------------------------------------------|----------------------------------------------------------------------|

### 3.C Mesurer ma glycémie après les repas :

|                                                    |                                                   |                                                  |                                                  |                                                   |
|----------------------------------------------------|---------------------------------------------------|--------------------------------------------------|--------------------------------------------------|---------------------------------------------------|
| Je ne le fais jamais<br><input type="checkbox"/> 1 | Je le fais rarement<br><input type="checkbox"/> 2 | Je le fais parfois<br><input type="checkbox"/> 3 | Je le fais souvent<br><input type="checkbox"/> 4 | Je le fais toujours<br><input type="checkbox"/> 5 |
|----------------------------------------------------|---------------------------------------------------|--------------------------------------------------|--------------------------------------------------|---------------------------------------------------|

**Module 5 : La mesure de la glycémie,  
qu'en est-il pour vous ?**

**4.A. Supporter la douleur quand je me pique au bout du doigt c'est :**

|                                       |                                       |                                       |                                       |                                       |
|---------------------------------------|---------------------------------------|---------------------------------------|---------------------------------------|---------------------------------------|
| Très difficile pour moi               | Difficile pour moi                    | Ni difficile ni facile pour moi       | Facile pour moi                       | Très facile pour moi                  |
| <input type="checkbox"/> <sub>1</sub> | <input type="checkbox"/> <sub>2</sub> | <input type="checkbox"/> <sub>3</sub> | <input type="checkbox"/> <sub>4</sub> | <input type="checkbox"/> <sub>5</sub> |

**4.B. Supporter la douleur quand je me pique au bout du doigt c'est :**

|                                                |                                       |                                                 |                                       |                                        |
|------------------------------------------------|---------------------------------------|-------------------------------------------------|---------------------------------------|----------------------------------------|
| Totalement inutile pour équilibrer mon diabète | Inutile pour équilibrer mon diabète   | Ni inutile ni utile pour équilibrer mon diabète | Utile pour équilibrer mon diabète     | Très utile pour équilibrer mon diabète |
| <input type="checkbox"/> <sub>1</sub>          | <input type="checkbox"/> <sub>2</sub> | <input type="checkbox"/> <sub>3</sub>           | <input type="checkbox"/> <sub>4</sub> | <input type="checkbox"/> <sub>5</sub>  |

**4.C Supporter la douleur quand je me pique au bout du doigt :**

|                                       |                                       |                                       |                                       |                                       |
|---------------------------------------|---------------------------------------|---------------------------------------|---------------------------------------|---------------------------------------|
| Je ne le fais jamais                  | Je le fais rarement                   | Je le fais parfois                    | Je le fais souvent                    | Je le fais toujours                   |
| <input type="checkbox"/> <sub>1</sub> | <input type="checkbox"/> <sub>2</sub> | <input type="checkbox"/> <sub>3</sub> | <input type="checkbox"/> <sub>4</sub> | <input type="checkbox"/> <sub>5</sub> |

**5.A. Agir pour corriger ma glycémie trop élevée c'est :**

|                                       |                                       |                                       |                                       |                                       |
|---------------------------------------|---------------------------------------|---------------------------------------|---------------------------------------|---------------------------------------|
| Très difficile pour moi               | Difficile pour moi                    | Ni difficile ni facile pour moi       | Facile pour moi                       | Très facile pour moi                  |
| <input type="checkbox"/> <sub>1</sub> | <input type="checkbox"/> <sub>2</sub> | <input type="checkbox"/> <sub>3</sub> | <input type="checkbox"/> <sub>4</sub> | <input type="checkbox"/> <sub>5</sub> |

**5.B. Agir pour corriger ma glycémie trop élevée c'est :**

|                                                |                                       |                                                 |                                       |                                        |
|------------------------------------------------|---------------------------------------|-------------------------------------------------|---------------------------------------|----------------------------------------|
| Totalement inutile pour équilibrer mon diabète | Inutile pour équilibrer mon diabète   | Ni inutile ni utile pour équilibrer mon diabète | Utile pour équilibrer mon diabète     | Très utile pour équilibrer mon diabète |
| <input type="checkbox"/> <sub>1</sub>          | <input type="checkbox"/> <sub>2</sub> | <input type="checkbox"/> <sub>3</sub>           | <input type="checkbox"/> <sub>4</sub> | <input type="checkbox"/> <sub>5</sub>  |

**5.C Agir pour corriger ma glycémie trop élevée :**

|                                       |                                       |                                       |                                       |                                       |
|---------------------------------------|---------------------------------------|---------------------------------------|---------------------------------------|---------------------------------------|
| Je ne le fais jamais                  | Je le fais rarement                   | Je le fais parfois                    | Je le fais souvent                    | Je le fais toujours                   |
| <input type="checkbox"/> <sub>1</sub> | <input type="checkbox"/> <sub>2</sub> | <input type="checkbox"/> <sub>3</sub> | <input type="checkbox"/> <sub>4</sub> | <input type="checkbox"/> <sub>5</sub> |

**6.A. Modifier mon alimentation pour corriger ma glycémie trop élevée c'est :**

|                                       |                                       |                                       |                                       |                                       |
|---------------------------------------|---------------------------------------|---------------------------------------|---------------------------------------|---------------------------------------|
| Très difficile pour moi               | Difficile pour moi                    | Ni difficile ni facile pour moi       | Facile pour moi                       | Très facile pour moi                  |
| <input type="checkbox"/> <sub>1</sub> | <input type="checkbox"/> <sub>2</sub> | <input type="checkbox"/> <sub>3</sub> | <input type="checkbox"/> <sub>4</sub> | <input type="checkbox"/> <sub>5</sub> |

**6.B. Modifier mon alimentation pour corriger ma glycémie trop élevée c'est :**

|                                                |                                       |                                                 |                                       |                                        |
|------------------------------------------------|---------------------------------------|-------------------------------------------------|---------------------------------------|----------------------------------------|
| Totalement inutile pour équilibrer mon diabète | Inutile pour équilibrer mon diabète   | Ni inutile ni utile pour équilibrer mon diabète | Utile pour équilibrer mon diabète     | Très utile pour équilibrer mon diabète |
| <input type="checkbox"/> <sub>1</sub>          | <input type="checkbox"/> <sub>2</sub> | <input type="checkbox"/> <sub>3</sub>           | <input type="checkbox"/> <sub>4</sub> | <input type="checkbox"/> <sub>5</sub>  |

**6.C Modifier mon alimentation pour corriger ma glycémie trop élevée :**

|                                       |                                       |                                       |                                       |                                       |
|---------------------------------------|---------------------------------------|---------------------------------------|---------------------------------------|---------------------------------------|
| Je ne le fais jamais                  | Je le fais rarement                   | Je le fais parfois                    | Je le fais souvent                    | Je le fais toujours                   |
| <input type="checkbox"/> <sub>1</sub> | <input type="checkbox"/> <sub>2</sub> | <input type="checkbox"/> <sub>3</sub> | <input type="checkbox"/> <sub>4</sub> | <input type="checkbox"/> <sub>5</sub> |

**7.A. Augmenter mon activité physique pour corriger ma glycémie trop élevée c'est :**

|                                       |                                       |                                       |                                       |                                       |
|---------------------------------------|---------------------------------------|---------------------------------------|---------------------------------------|---------------------------------------|
| Très difficile pour moi               | Difficile pour moi                    | Ni difficile ni facile pour moi       | Facile pour moi                       | Très facile pour moi                  |
| <input type="checkbox"/> <sub>1</sub> | <input type="checkbox"/> <sub>2</sub> | <input type="checkbox"/> <sub>3</sub> | <input type="checkbox"/> <sub>4</sub> | <input type="checkbox"/> <sub>5</sub> |

**7.B. Augmenter mon activité physique pour corriger ma glycémie trop élevée c'est :**

|                                                |                                       |                                                 |                                       |                                        |
|------------------------------------------------|---------------------------------------|-------------------------------------------------|---------------------------------------|----------------------------------------|
| Totalement inutile pour équilibrer mon diabète | Inutile pour équilibrer mon diabète   | Ni inutile ni utile pour équilibrer mon diabète | Utile pour équilibrer mon diabète     | Très utile pour équilibrer mon diabète |
| <input type="checkbox"/> <sub>1</sub>          | <input type="checkbox"/> <sub>2</sub> | <input type="checkbox"/> <sub>3</sub>           | <input type="checkbox"/> <sub>4</sub> | <input type="checkbox"/> <sub>5</sub>  |

**Module 5 : La mesure de la glycémie,  
qu'en est-il pour vous ?**

**7.C Augmenter mon activité physique pour corriger ma glycémie trop élevée :**

Je ne le fais jamais ☐<sub>1</sub> Je le fais rarement ☐<sub>2</sub> Je le fais parfois ☐<sub>3</sub> Je le fais souvent ☐<sub>4</sub> Je le fais toujours ☐<sub>5</sub>

**8.A. Augmenter la dose de mes médicaments pour corriger ma glycémie trop élevée c'est :**

Très difficile pour moi ☐<sub>1</sub> Difficile pour moi ☐<sub>2</sub> Ni difficile ni facile pour moi ☐<sub>3</sub> Facile pour moi ☐<sub>4</sub> Très facile pour moi ☐<sub>5</sub>

**8.B. Augmenter la dose de mes médicaments pour corriger ma glycémie trop élevée c'est :**

Totalement inutile pour équilibrer mon diabète ☐<sub>1</sub> Inutile pour équilibrer mon diabète ☐<sub>2</sub> Ni inutile ni utile pour équilibrer mon diabète ☐<sub>3</sub> Utile pour équilibrer mon diabète ☐<sub>4</sub> Très utile pour équilibrer mon diabète ☐<sub>5</sub>

**8.C Augmenter la dose de mes médicaments pour corriger ma glycémie trop élevée :**

Je ne le fais jamais ☐<sub>1</sub> Je le fais rarement ☐<sub>2</sub> Je le fais parfois ☐<sub>3</sub> Je le fais souvent ☐<sub>4</sub> Je le fais toujours ☐<sub>5</sub>

Un traitement de vos données personnelles va être mis en œuvre pour permettre d'analyser les résultats de l'étude observationnelle à laquelle vous participez. A cette fin, les données médicales vous concernant et les données relatives à vos habitudes de vie seront transmises au Promoteur de la recherche ou aux personnes ou sociétés agissant pour son compte, en France. Ces données pourront également, dans des conditions assurant leur confidentialité, être transmises aux autorités de santé françaises ou étrangères, à d'autres entités du Promoteur. Conformément aux dispositions de loi relative à l'informatique aux fichiers et aux libertés, vous disposez d'un droit d'accès et de rectification. Vous disposez également d'un droit d'opposition à la transmission des données couvertes par le secret professionnel susceptibles d'être utilisées dans le cadre de cette recherche et d'être traitées. Vous pouvez également accéder directement ou par l'intermédiaire d'un médecin de votre choix à l'ensemble de vos données médicales en application des dispositions de l'article L 1111-7 du Code de la Santé Publique. Ces droits s'exercent auprès du médecin qui vous suit dans le cadre de la recherche et qui connaît votre identité.
